# Supplementary material for: Deletion of FUNDC2 and CMC4 on Chromosome Xq28 Is Sufficient to Cause Hypergonadotropic Hypogonadism in Men
Source: Front Genet. 2020 Sep 22;11:557341. doi: 10.3389/fgene.2020.557341 (PMC7537572; doi:10.3389/fgene.2020.557341)
Supplement: DATASET 1 — Raw read counts for eight RNA-seq samples. [file Table_2.XLSX]

## Sheet: Raw read counts
ensembl_gene_id	gene_name	Patient	Mother	Brother	Uncle	Ctrl_male_1	Ctrl_male_2	Ctrl_male_3	Ctrl_female_1	Ctrl_female_2	Ctrl_female_3
ENSG00000000003	TSPAN6	4	3	0	0	12	10	7	13	3	6
ENSG00000000005	TNMD	0	0	0	0	0	0	0	0	0	0
ENSG00000000419	DPM1	477	534	15	78	269	241	216	293	212	289
ENSG00000000457	SCYL3	732	761	18	100	415	343	342	466	381	422
ENSG00000000460	C1orf112	318	303	17	92	175	194	149	195	138	186
ENSG00000000938	FGR	23783	23853	481	735	8549	15785	16068	12085	15391	8942
ENSG00000000971	CFH	198	189	6	19	34	32	63	35	16	15
ENSG00000001036	FUCA2	793	800	25	10	250	370	368	378	325	287
ENSG00000001084	GCLC	426	379	0	23	244	282	169	344	132	245
ENSG00000001167	NFYA	1967	2530	23	90	502	489	389	593	567	597
ENSG00000001460	STPG1	116	79	0	11	53	48	33	56	40	58
ENSG00000001461	NIPAL3	552	526	0	155	628	478	438	748	416	697
ENSG00000001497	LAS1L	642	668	47	135	425	512	448	545	418	478
ENSG00000001561	ENPP4	186	155	2	7	160	193	70	218	71	175
ENSG00000001617	SEMA3F	1	0	9	0	0	1	1	0	0	0
ENSG00000001626	CFTR	0	0	0	6	0	0	0	0	0	0
ENSG00000001629	ANKIB1	794	769	28	67	461	300	268	589	232	462
ENSG00000001630	CYP51A1	11	11	0	0	7	0	5	2	2	2
ENSG00000001631	KRIT1	51	35	0	7	60	64	40	84	39	70
ENSG00000002016	RAD52	217	225	9	28	120	143	111	160	92	164
ENSG00000002079	MYH16	0	0	0	0	1	3	1	3	1	1
ENSG00000002330	BAD	307	243	22	60	206	299	374	264	243	241
ENSG00000002549	LAP3	1388	3926	37	111	917	1600	940	1623	902	1151
ENSG00000002586	CD99	1	0	0	0	2	0	0	0	0	0
ENSG00000002587	HS3ST1	8	15	0	0	32	19	22	9	17	28
ENSG00000002726	AOC1	30	4	0	15	75	50	8	39	171	50
ENSG00000002745	WNT16	15	14	0	0	21	8	19	13	10	15
ENSG00000002746	HECW1	3	1	0	0	0	0	0	1	0	0
ENSG00000002822	MAD1L1	56	93	1	37	130	97	75	162	87	79
ENSG00000002834	LASP1	12213	12506	244	1106	5598	7961	9323	7855	11690	6611
ENSG00000002919	SNX11	1586	1690	29	240	744	1252	1490	1203	1974	899
ENSG00000002933	TMEM176A	876	48	2	0	466	1049	43	1085	639	490
ENSG00000003056	M6PR	2833	2553	129	306	2059	2463	1908	3092	1828	2145
ENSG00000003096	KLHL13	7	3	0	0	30	11	4	11	7	4
ENSG00000003137	CYP26B1	0	0	0	0	2	0	0	0	63	0
ENSG00000003147	ICA1	79	144	0	19	32	52	51	42	44	24
ENSG00000003249	DBNDD1	32	34	3	37	127	55	70	42	74	60
ENSG00000003393	ALS2	330	237	9	24	147	199	182	206	153	182
ENSG00000003400	CASP10	930	1008	8	177	903	1245	787	1343	1025	1066
ENSG00000003402	CFLAR	19478	16835	210	943	3810	5008	6342	5377	9483	6204
ENSG00000003436	TFPI	3	8	0	18	5	5	8	3	4	0
ENSG00000003509	NDUFAF7	401	400	0	102	224	195	168	241	209	249
ENSG00000003756	RBM5	4375	4104	73	753	3316	3940	4096	4373	5520	4394
ENSG00000003987	MTMR7	82	59	9	17	62	71	43	91	73	82
ENSG00000003989	SLC7A2	0	0	0	0	0	0	0	0	0	0
ENSG00000004059	ARF5	2299	2369	116	271	1303	1874	2223	1822	1864	1532
ENSG00000004139	SARM1	594	593	20	150	492	507	516	739	416	571
ENSG00000004142	POLDIP2	1124	1182	16	121	714	1100	930	928	769	793
ENSG00000004399	PLXND1	2295	2075	52	112	1015	1210	1344	1306	1066	704
ENSG00000004455	AK2	2005	2027	83	256	1340	1560	1290	1491	1106	1340
ENSG00000004468	CD38	198	197	0	33	269	521	148	725	253	397
ENSG00000004478	FKBP4	792	816	49	151	540	823	712	822	664	604
ENSG00000004487	KDM1A	962	914	40	162	773	815	598	792	570	716
ENSG00000004534	RBM6	3031	3103	122	841	1567	1844	2516	2215	2997	2466
ENSG00000004660	CAMKK1	775	657	8	21	339	487	562	346	933	433
ENSG00000004700	RECQL	1089	1161	14	142	721	535	369	882	487	766
ENSG00000004766	VPS50	329	315	0	71	244	219	169	269	174	272
ENSG00000004776	HSPB6	0	0	0	7	0	0	0	0	0	0
ENSG00000004777	ARHGAP33	234	142	0	31	141	179	257	207	136	206
ENSG00000004779	NDUFAB1	455	452	10	113	216	284	234	246	147	275
ENSG00000004799	PDK4	226	395	0	0	114	126	121	140	197	90
ENSG00000004809	SLC22A16	40	32	10	0	7	24	33	3	21	19
ENSG00000004838	ZMYND10	54	43	0	23	32	62	69	49	55	58
ENSG00000004846	ABCB5	0	0	0	0	0	0	0	0	0	1
ENSG00000004848	ARX	0	0	0	0	0	0	0	0	0	0
ENSG00000004864	SLC25A13	306	289	25	51	117	143	87	133	111	141
ENSG00000004866	ST7	132	113	11	37	82	108	75	96	60	77
ENSG00000004897	CDC27	728	822	0	91	484	463	324	541	405	531
ENSG00000004939	SLC4A1	2	8	28	19	4321	2052	1771	1194	756	684
ENSG00000004948	CALCR	0	0	0	0	1	0	0	0	0	0
ENSG00000004961	HCCS	246	282	8	66	259	296	245	268	247	251
ENSG00000004975	DVL2	593	551	28	96	453	444	473	544	374	430
ENSG00000005001	PRSS22	19	9	0	7	12	10	7	7	0	5
ENSG00000005007	UPF1	3535	3356	56	307	2544	2315	3855	2558	4532	2508
ENSG00000005020	SKAP2	4163	4742	10	141	1219	1330	1414	1572	2582	934
ENSG00000005022	SLC25A5	4182	3606	117	352	2091	3195	2124	2774	1681	2044
ENSG00000005059	MCUB	1036	1157	23	223	705	650	499	928	427	871
ENSG00000005073	HOXA11	0	0	0	0	0	0	1	1	0	0
ENSG00000005075	POLR2J	683	804	3	110	549	662	649	566	582	427
ENSG00000005100	DHX33	335	271	48	73	153	153	111	231	148	211
ENSG00000005102	MEOX1	26	62	0	28	21	20	21	54	39	27
ENSG00000005108	THSD7A	2	8	0	14	0	3	0	4	0	0
ENSG00000005156	LIG3	755	707	29	92	755	864	832	817	954	709
ENSG00000005175	RPAP3	647	761	37	82	382	370	308	450	337	437
ENSG00000005187	ACSM3	113	108	2	2	155	88	91	127	78	65
ENSG00000005189	REXO5	33	38	0	3	17	6	13	19	30	10
ENSG00000005194	CIAPIN1	571	547	15	126	582	641	499	673	432	657
ENSG00000005206	SPPL2B	648	568	40	103	803	657	980	658	733	1034
ENSG00000005238	FAM214B	3179	2687	39	228	1182	1521	1829	1214	2301	1193
ENSG00000005243	COPZ2	26	21	0	27	30	63	39	53	16	25
ENSG00000005249	PRKAR2B	330	460	78	450	259	341	270	301	286	168
ENSG00000005302	MSL3	2762	2447	69	391	1573	1520	1268	2048	2073	2510
ENSG00000005339	CREBBP	5802	6303	65	244	1751	1477	2136	1967	3276	1780
ENSG00000005379	TSPOAP1	918	527	4	180	860	1256	582	1022	595	732
ENSG00000005381	MPO	65	194	30	44	55	138	237	64	78	67
ENSG00000005421	PON1	0	0	0	0	0	0	0	0	0	1
ENSG00000005436	GCFC2	248	274	20	67	170	141	128	200	97	227
ENSG00000005448	WDR54	224	213	0	134	181	228	225	284	144	211
ENSG00000005469	CROT	108	128	14	26	125	150	88	165	93	194
ENSG00000005471	ABCB4	36	69	0	14	55	13	37	15	28	40
ENSG00000005483	KMT2E	5269	5363	53	271	1333	1166	1092	1517	1501	1206
ENSG00000005486	RHBDD2	1015	956	12	174	757	1066	1137	957	1118	680
ENSG00000005513	SOX8	31	40	0	14	43	35	16	43	20	36
ENSG00000005700	IBTK	640	478	23	61	378	279	213	444	214	447
ENSG00000005801	ZNF195	325	333	26	34	208	208	147	312	145	244
ENSG00000005810	MYCBP2	3529	3415	36	153	1304	833	878	1535	1070	1222
ENSG00000005812	FBXL3	832	937	27	248	1109	834	595	971	956	1143
ENSG00000005844	ITGAL	12512	13838	256	1587	6067	7791	8346	9442	7560	7580
ENSG00000005882	PDK2	352	404	27	89	366	476	381	420	292	270
ENSG00000005884	ITGA3	65	116	5	25	62	50	69	67	41	65
ENSG00000005889	ZFX	833	1246	0	50	456	299	257	683	535	648
ENSG00000005893	LAMP2	5303	6114	55	166	2171	3014	3088	2264	5354	2611
ENSG00000005961	ITGA2B	377	515	233	663	318	573	559	183	432	195
ENSG00000005981	ASB4	0	0	0	0	0	0	0	0	0	0
ENSG00000006007	GDE1	2416	2253	35	147	763	897	947	806	1205	813
ENSG00000006015	REX1BD	500	460	10	128	374	494	557	427	395	620
ENSG00000006016	CRLF1	391	332	0	51	174	220	256	200	189	160
ENSG00000006025	AC003665.1	705	579	25	103	434	627	704	693	514	639
ENSG00000006042	TMEM98	1	1	4	0	0	0	0	0	0	0
ENSG00000006047	YBX2	2	1	13	0	3	2	6	2	3	0
ENSG00000006059	KRT33A	0	0	0	0	0	0	0	0	0	0
ENSG00000006062	MAP3K14	1647	1532	39	235	1172	1014	1265	1294	1249	943
ENSG00000006071	ABCC8	0	0	0	0	0	0	1	0	0	0
ENSG00000006116	CACNG3	0	0	0	0	0	0	0	0	0	0
ENSG00000006118	TMEM132A	203	224	0	0	58	113	89	51	119	47
ENSG00000006125	AP2B1	3161	3470	122	499	2163	2424	2370	2595	2400	2222
ENSG00000006128	TAC1	0	0	0	0	0	0	0	0	0	0
ENSG00000006194	ZNF263	1130	1126	52	192	667	712	628	737	590	705
ENSG00000006210	CX3CL1	1	2	0	0	0	0	0	0	0	0
ENSG00000006282	SPATA20	442	622	19	86	358	422	418	422	321	155
ENSG00000006283	CACNA1G	0	0	0	0	1	0	2	0	0	0
ENSG00000006327	TNFRSF12A	108	122	0	7	44	59	95	38	111	53
ENSG00000006377	DLX6	0	0	0	0	0	0	0	0	0	0
ENSG00000006432	MAP3K9	101	109	18	13	105	78	62	119	69	76
ENSG00000006451	RALA	487	511	9	118	425	434	300	436	316	489
ENSG00000006453	BAIAP2L1	95	88	0	11	27	16	12	48	29	34
ENSG00000006459	KDM7A	2467	2699	18	147	750	717	618	818	1017	952
ENSG00000006468	ETV1	1	7	0	5	0	1	2	0	1	0
ENSG00000006530	AGK	439	369	23	107	598	667	411	735	341	585
ENSG00000006534	ALDH3B1	1298	1125	25	94	1119	1217	1357	1182	1428	752
ENSG00000006555	TTC22	159	172	0	61	179	261	293	269	217	215
ENSG00000006576	PHTF2	405	479	13	15	352	245	154	380	179	393
ENSG00000006606	CCL26	2	0	0	0	0	1	0	0	0	0
ENSG00000006607	FARP2	295	276	23	72	227	234	222	232	124	211
ENSG00000006611	USH1C	0	0	0	0	0	0	0	0	0	0
ENSG00000006625	GGCT	68	94	10	16	48	42	37	60	27	63
ENSG00000006634	DBF4	188	250	0	9	149	139	90	161	98	143
ENSG00000006638	TBXA2R	13	14	0	19	61	47	40	60	36	71
ENSG00000006652	IFRD1	4397	4618	40	194	548	623	675	591	1407	868
ENSG00000006659	LGALS14	0	3	0	0	0	0	0	0	0	1
ENSG00000006695	COX10	259	306	0	46	169	221	175	206	148	175
ENSG00000006704	GTF2IRD1	9	20	3	6	9	9	8	4	4	5
ENSG00000006712	PAF1	1353	1346	47	312	692	934	1052	855	1069	742
ENSG00000006715	VPS41	921	1026	25	38	804	666	740	854	808	753
ENSG00000006740	ARHGAP44	8	8	0	0	13	8	16	18	6	11
ENSG00000006744	ELAC2	701	690	33	215	818	934	680	952	642	738
ENSG00000006747	SCIN	3	6	0	0	2	5	0	0	1	5
ENSG00000006756	ARSD	544	593	0	0	285	312	271	399	436	319
ENSG00000006757	PNPLA4	85	127	0	21	68	73	56	92	63	69
ENSG00000006788	MYH13	0	0	0	0	0	0	0	0	0	1
ENSG00000006831	ADIPOR2	1302	1281	17	139	735	1055	971	947	988	799
ENSG00000006837	CDKL3	6	1	0	0	6	2	1	8	5	9
ENSG00000007001	UPP2	0	0	0	0	1	0	0	0	0	0
ENSG00000007038	PRSS21	44	24	12	28	64	24	52	149	65	33
ENSG00000007047	MARK4	762	616	6	84	307	346	390	461	643	346
ENSG00000007062	PROM1	0	1	0	0	0	2	4	2	5	5
ENSG00000007080	CCDC124	314	288	37	42	469	558	506	442	309	435
ENSG00000007129	CEACAM21	366	505	49	130	292	272	417	470	524	352
ENSG00000007168	PAFAH1B1	2635	2746	40	431	1605	1746	1401	1759	1805	1696
ENSG00000007171	NOS2	5	0	6	0	3	0	3	0	0	3
ENSG00000007174	DNAH9	1	0	0	0	0	0	0	0	1	2
ENSG00000007202	KIAA0100	4040	3809	84	280	2085	1778	2296	2704	2468	1984
ENSG00000007216	SLC13A2	0	0	0	7	0	0	0	0	0	0
ENSG00000007237	AC005747.1	6380	3749	101	134	1416	1939	1675	1806	2660	1377
ENSG00000007255	TRAPPC6A	254	227	8	93	446	499	462	499	294	412
ENSG00000007264	MATK	741	391	37	136	1052	2250	1209	1634	648	1052
ENSG00000007306	CEACAM7	1	1	0	0	0	0	0	0	0	0
ENSG00000007312	CD79B	454	548	12	32	731	580	907	613	582	644
ENSG00000007314	SCN4A	2	3	0	0	6	5	9	9	5	7
ENSG00000007341	ST7L	273	349	3	38	81	118	101	145	110	119
ENSG00000007350	TKTL1	66	73	0	43	145	126	70	337	174	127
ENSG00000007372	PAX6	36	15	0	0	30	21	14	29	16	29
ENSG00000007376	RPUSD1	320	344	2	48	391	469	492	389	388	454
ENSG00000007384	RHBDF1	4	0	0	0	2	1	2	1	2	1
ENSG00000007392	LUC7L	1013	871	63	247	799	856	812	952	786	939
ENSG00000007402	CACNA2D2	263	301	14	70	212	287	267	285	182	264
ENSG00000007516	BAIAP3	893	690	17	134	378	401	593	298	637	319
ENSG00000007520	TSR3	606	589	29	102	508	672	710	512	575	536
ENSG00000007541	PIGQ	327	314	7	87	422	513	593	408	487	489
ENSG00000007545	CRAMP1	272	241	18	44	228	281	177	289	237	223
ENSG00000007866	TEAD3	7	2	0	0	2	4	1	3	1	4
ENSG00000007908	SELE	0	1	0	0	0	2	3	1	0	0
ENSG00000007923	DNAJC11	658	620	17	148	544	644	548	709	454	601
ENSG00000007933	FMO3	0	0	0	0	0	0	0	0	0	0
ENSG00000007944	MYLIP	4328	4975	81	114	1094	1091	901	1072	1516	1081
ENSG00000007952	NOX1	3	0	3	0	12	2	2	3	1	3
ENSG00000007968	E2F2	150	259	0	54	208	253	211	250	138	166
ENSG00000008018	PSMB1	2169	2348	99	420	1227	1289	1399	1298	1208	1402
ENSG00000008056	SYN1	24	22	0	24	21	37	23	19	23	16
ENSG00000008083	JARID2	1955	1996	19	83	858	980	1131	974	1343	783
ENSG00000008086	CDKL5	275	250	8	27	102	91	138	110	276	105
ENSG00000008118	CAMK1G	3	4	0	0	0	0	0	0	0	0
ENSG00000008128	CDK11A	84	52	0	25	24	46	52	32	51	50
ENSG00000008130	NADK	9748	12575	107	368	4482	5020	9067	5868	13519	5683
ENSG00000008196	TFAP2B	0	0	0	0	0	0	0	0	0	0
ENSG00000008197	TFAP2D	0	0	0	0	0	0	0	0	0	0
ENSG00000008226	DLEC1	1257	1443	41	188	546	918	876	707	895	700
ENSG00000008256	CYTH3	340	266	16	102	201	296	252	327	209	169
ENSG00000008277	ADAM22	45	26	0	0	41	29	23	56	32	76
ENSG00000008282	SYPL1	487	566	0	45	826	630	492	732	600	719
ENSG00000008283	CYB561	410	702	31	102	416	497	783	777	330	502
ENSG00000008294	SPAG9	3271	2851	28	114	817	863	940	962	1667	1058
ENSG00000008300	CELSR3	117	98	5	38	142	99	94	150	58	84
ENSG00000008311	AASS	125	69	14	38	33	32	20	17	26	7
ENSG00000008323	PLEKHG6	117	76	0	0	8	6	7	18	19	7
ENSG00000008324	SS18L2	421	464	18	85	195	218	164	211	119	196
ENSG00000008382	MPND	275	233	17	48	261	466	355	345	286	270
ENSG00000008394	MGST1	339	358	10	0	127	255	132	153	191	136
ENSG00000008405	CRY1	289	294	0	43	192	150	108	256	118	181
ENSG00000008438	PGLYRP1	579	843	47	95	259	440	1089	341	1262	734
ENSG00000008441	NFIX	124	119	11	3	255	153	206	179	107	115
ENSG00000008513	ST3GAL1	2949	2766	121	281	2312	1868	2034	2512	2176	1965
ENSG00000008516	MMP25	21480	18296	167	412	4448	7800	15504	5625	20899	8355
ENSG00000008517	IL32	2295	2985	192	1921	2375	3629	3312	3576	2041	3706
ENSG00000008710	PKD1	600	540	6	138	1042	589	741	1087	622	980
ENSG00000008735	MAPK8IP2	9	17	0	10	5	12	20	10	7	9
ENSG00000008838	MED24	847	853	42	110	791	947	851	1105	633	834
ENSG00000008853	RHOBTB2	475	481	41	46	378	279	368	394	175	304
ENSG00000008869	HEATR5B	1323	1356	20	130	710	542	472	768	563	608
ENSG00000008952	SEC62	1241	1458	28	326	1089	833	702	966	989	1105
ENSG00000008988	RPS20	19026	19846	1245	9801	9737	6113	5438	7962	4102	8478
ENSG00000009307	CSDE1	12327	11600	333	1133	5323	4382	4217	5648	4952	5419
ENSG00000009335	UBE3C	1565	1316	49	185	756	683	578	920	549	780
ENSG00000009413	REV3L	721	643	18	32	289	192	169	335	198	281
ENSG00000009694	TENM1	262	218	0	1	68	49	13	110	151	142
ENSG00000009709	PAX7	0	0	0	0	0	0	0	0	0	0
ENSG00000009724	MASP2	129	113	3	19	103	105	88	114	160	121
ENSG00000009765	IYD	0	0	0	0	0	0	0	0	0	0
ENSG00000009780	FAM76A	205	219	10	40	212	208	186	202	155	194
ENSG00000009790	TRAF3IP3	5427	5825	123	2072	5008	5492	4487	6445	4837	5812
ENSG00000009830	POMT2	164	147	0	55	77	116	134	119	126	84
ENSG00000009844	VTA1	574	511	40	76	420	369	305	491	365	408
ENSG00000009950	MLXIPL	0	0	0	0	0	0	1	0	0	0
ENSG00000009954	BAZ1B	1987	2048	45	209	933	860	755	1097	762	924
ENSG00000010017	RANBP9	1313	1353	14	89	395	496	357	564	387	461
ENSG00000010030	ETV7	94	473	0	25	163	39	207	258	131	178
ENSG00000010072	SPRTN	412	450	9	28	141	122	97	169	132	133
ENSG00000010165	EEF1AKNMT	349	394	7	80	442	531	441	601	442	412
ENSG00000010219	DYRK4	179	162	0	54	117	130	127	110	63	105
ENSG00000010244	ZNF207	2931	3094	51	334	2050	2432	1518	2705	1991	2505
ENSG00000010256	UQCRC1	1763	1564	63	255	1413	2307	2052	1924	1673	1389
ENSG00000010270	STARD3NL	829	966	54	107	242	305	246	322	354	295
ENSG00000010278	CD9	310	236	41	195	399	333	322	332	404	125
ENSG00000010282	HHATL	8	4	0	0	0	0	1	0	3	1
ENSG00000010292	NCAPD2	1459	1250	46	210	928	992	806	1438	919	950
ENSG00000010295	IFFO1	2017	1538	21	341	1160	1795	1735	1547	2113	1498
ENSG00000010310	GIPR	103	81	9	9	78	87	113	80	77	58
ENSG00000010318	PHF7	110	87	0	30	46	49	61	59	42	51
ENSG00000010319	SEMA3G	21	35	0	5	3	7	9	17	1	10
ENSG00000010322	NISCH	2509	2050	91	297	2296	2281	2790	2766	2751	2445
ENSG00000010327	STAB1	5335	4233	36	59	1521	2065	1591	2023	3135	1635
ENSG00000010361	FUZ	616	434	48	64	330	534	687	358	529	377
ENSG00000010379	SLC6A13	4	18	0	0	4	4	5	6	7	4
ENSG00000010404	IDS	932	634	11	18	169	156	233	212	300	190
ENSG00000010438	PRSS3	3	1	0	0	2	8	3	6	3	0
ENSG00000010539	ZNF200	483	677	28	80	280	329	294	344	465	344
ENSG00000010610	CD4	8785	9115	186	1064	4718	5756	4991	5890	5468	4079
ENSG00000010626	LRRC23	85	60	7	13	49	45	52	81	53	66
ENSG00000010671	BTK	2596	2997	60	208	1352	1319	1507	1605	1806	1121
ENSG00000010704	HFE	282	162	0	6	89	70	101	125	120	108
ENSG00000010803	SCMH1	257	270	14	62	268	236	194	254	167	228
ENSG00000010810	FYN	4473	4328	176	1025	2978	4457	2857	4058	2145	2724
ENSG00000010818	HIVEP2	2208	2052	0	215	668	467	401	786	538	696
ENSG00000010932	FMO1	0	3	0	0	2	1	0	2	2	0
ENSG00000011007	ELOA	1266	1291	66	181	652	691	624	783	585	637
ENSG00000011009	LYPLA2	1155	1159	36	340	1170	1733	1776	1337	1522	1170
ENSG00000011021	CLCN6	570	494	29	32	333	365	274	397	304	400
ENSG00000011028	AC080038.1	13	17	0	24	214	141	106	77	77	66
ENSG00000011052	NME1-NME2	0	0	0	0	0	0	0	0	0	0
ENSG00000011083	SLC6A7	0	0	0	0	0	3	0	0	0	0
ENSG00000011105	TSPAN9	51	86	51	66	45	80	90	45	64	39
ENSG00000011114	BTBD7	651	508	8	51	314	258	223	332	328	291
ENSG00000011132	AC005954.1	466	423	1	82	386	416	569	596	512	552
ENSG00000011143	MKS1	191	158	9	35	152	165	117	157	99	140
ENSG00000011198	ABHD5	2597	2462	35	61	668	776	1215	658	1877	672
ENSG00000011201	ANOS1	4	5	0	0	0	2	0	0	0	1
ENSG00000011243	AKAP8L	2162	1958	90	344	1185	1236	1801	1317	1614	1447
ENSG00000011258	MBTD1	683	594	32	106	378	306	257	436	307	422
ENSG00000011260	UTP18	632	607	5	187	498	470	376	484	321	452
ENSG00000011275	RNF216	2013	1775	102	248	1672	1539	1681	1816	1849	1584
ENSG00000011295	TTC19	467	413	7	86	335	378	195	354	176	347
ENSG00000011304	PTBP1	2890	3040	147	710	2607	2476	2517	2941	2222	2661
ENSG00000011332	DPF1	1	1	0	0	0	1	1	2	2	4
ENSG00000011347	SYT7	1	1	0	0	0	0	1	2	0	0
ENSG00000011376	LARS2	216	161	12	35	180	200	182	227	143	219
ENSG00000011405	PIK3C2A	507	422	6	42	321	222	157	341	220	297
ENSG00000011422	PLAUR	4289	5339	54	65	762	1440	1442	1207	2782	1254
ENSG00000011426	ANLN	8	16	0	0	6	6	3	16	5	11
ENSG00000011451	WIZ	466	479	3	90	478	574	580	650	621	580
ENSG00000011454	RABGAP1	829	818	40	122	429	437	363	539	364	449
ENSG00000011465	DCN	1	4	0	0	0	1	2	0	1	0
ENSG00000011478	QPCTL	105	88	9	43	109	151	119	156	103	150
ENSG00000011485	PPP5C	574	570	21	118	497	438	567	722	324	562
ENSG00000011523	CEP68	462	508	9	98	435	364	247	443	298	390
ENSG00000011566	MAP4K3	144	117	0	19	89	47	28	99	41	83
ENSG00000011590	ZBTB32	35	37	0	0	36	46	74	96	35	59
ENSG00000011600	TYROBP	15912	18538	370	653	7677	15438	15189	10371	18627	7766
ENSG00000011638	TMEM159	168	209	0	45	178	168	175	219	154	147
ENSG00000011677	GABRA3	0	0	0	0	0	0	0	0	0	1
ENSG00000012048	BRCA1	186	208	9	8	64	61	78	113	145	117
ENSG00000012061	ERCC1	1119	973	22	119	868	1163	899	1102	821	878
ENSG00000012124	CD22	997	1354	41	20	1400	572	1366	920	1175	1269
ENSG00000012171	SEMA3B	49	48	4	0	11	4	29	6	27	8
ENSG00000012174	MBTPS2	88	67	0	0	79	62	47	102	50	62
ENSG00000012211	PRICKLE3	2302	2432	63	341	835	1696	1174	892	1664	1085
ENSG00000012223	LTF	200	2220	167	539	180	568	921	56	152	285
ENSG00000012232	EXTL3	1991	1811	59	135	910	1003	1565	966	2336	883
ENSG00000012504	NR1H4	0	0	0	0	0	0	0	0	0	0
ENSG00000012660	ELOVL5	4173	4773	96	248	2094	2164	1975	2373	3273	2645
ENSG00000012779	ALOX5	13515	12735	97	260	3835	5061	8291	3422	12230	5173
ENSG00000012817	KDM5D	2611	0	33	611	1531	1412	1285	0	12	3
ENSG00000012822	CALCOCO1	4208	4192	97	505	2164	2335	3096	2451	3786	2350
ENSG00000012963	UBR7	559	605	6	143	383	419	289	408	323	376
ENSG00000012983	MAP4K5	518	470	37	80	325	215	132	341	119	224
ENSG00000013016	EHD3	239	246	75	187	184	202	261	215	154	119
ENSG00000013275	PSMC4	1315	1415	87	253	859	1290	1079	1190	997	873
ENSG00000013288	MAN2B2	2213	1907	26	203	1347	1364	1734	1633	1912	1243
ENSG00000013293	SLC7A14	0	0	0	8	0	0	0	0	0	0
ENSG00000013297	CLDN11	3	0	0	0	0	0	1	3	6	1
ENSG00000013306	SLC25A39	1128	1034	61	371	19810	15264	17245	7869	7976	5823
ENSG00000013364	MVP	7986	7641	116	852	4480	6147	7749	5896	9225	6135
ENSG00000013374	NUB1	2418	3440	48	227	1473	1671	1691	2033	1870	1670
ENSG00000013375	PGM3	303	248	1	96	264	274	191	298	194	302
ENSG00000013392	RWDD2A	72	82	12	12	73	58	45	73	29	40
ENSG00000013441	CLK1	5000	4970	102	623	2098	1785	1164	2280	2106	3050
ENSG00000013503	POLR3B	73	83	16	31	112	134	90	130	92	86
ENSG00000013523	ANGEL1	457	432	4	51	372	296	220	489	268	350
ENSG00000013561	RNF14	394	375	14	64	395	399	264	431	297	383
ENSG00000013563	DNASE1L1	1293	1168	49	106	685	876	923	904	918	826
ENSG00000013573	DDX11	121	374	0	119	632	95	357	385	106	444
ENSG00000013583	HEBP1	431	394	0	45	294	394	287	395	236	246
ENSG00000013588	GPRC5A	0	0	1	3	0	0	0	0	0	0
ENSG00000013619	MAMLD1	42	31	0	0	25	14	11	10	14	14
ENSG00000013725	CD6	1809	3005	105	1256	3094	3214	2620	3407	2036	4403
ENSG00000013810	TACC3	5597	4278	123	717	2065	2547	4715	2399	5574	2610
ENSG00000014123	UFL1	426	352	10	86	393	241	164	482	207	395
ENSG00000014138	POLA2	71	59	0	20	105	139	117	128	110	91
ENSG00000014164	ZC3H3	745	765	10	73	524	559	958	574	817	488
ENSG00000014216	CAPN1	3651	3369	186	634	2474	2760	3818	2999	3286	2077
ENSG00000014257	ACPP	812	828	0	19	165	193	242	246	293	112
ENSG00000014641	MDH1	1263	1279	35	246	796	967	724	1065	585	862
ENSG00000014824	SLC30A9	469	501	35	13	312	227	166	353	188	314
ENSG00000014914	MTMR11	589	476	1	13	268	458	366	456	341	325
ENSG00000014919	COX15	321	325	11	51	318	420	395	348	407	375
ENSG00000015133	CCDC88C	2843	2466	112	487	2467	2170	2111	3096	1788	2732
ENSG00000015153	YAF2	289	324	10	36	212	143	158	232	190	204
ENSG00000015171	ZMYND11	1020	809	69	108	580	388	236	612	236	521
ENSG00000015285	WAS	9766	10076	210	648	4118	6021	8867	4949	10012	4555
ENSG00000015413	DPEP1	0	0	0	0	0	0	0	0	0	0
ENSG00000015475	BID	2639	3089	128	209	1190	2089	2146	1579	2282	1475
ENSG00000015479	MATR3	30	17	0	6	22	23	11	48	29	39
ENSG00000015520	NPC1L1	0	0	0	0	3	1	1	0	3	4
ENSG00000015532	XYLT2	315	300	25	87	509	547	520	650	384	495
ENSG00000015568	RGPD5	0	0	0	0	0	1	0	0	0	0
ENSG00000015592	STMN4	2	0	0	0	0	3	2	0	1	0
ENSG00000015676	NUDCD3	1017	957	47	317	1147	1242	1052	1316	904	1162
ENSG00000016082	ISL1	0	0	0	0	0	0	0	0	0	0
ENSG00000016391	CHDH	10	10	0	0	12	12	8	7	13	4
ENSG00000016402	IL20RA	0	0	0	0	0	0	0	0	0	0
ENSG00000016490	CLCA1	1	0	0	0	0	0	0	0	0	0
ENSG00000016602	CLCA4	0	0	0	0	2	0	0	4	0	0
ENSG00000016864	GLT8D1	697	626	30	107	438	536	373	485	327	460
ENSG00000017260	ATP2C1	965	920	27	124	587	652	478	771	522	650
ENSG00000017427	IGF1	4	0	0	0	2	1	1	5	0	3
ENSG00000017483	SLC38A5	187	209	9	74	907	631	782	804	303	563
ENSG00000017797	RALBP1	3392	4808	25	186	1058	1104	1526	1131	3494	1209
ENSG00000018189	RUFY3	669	592	20	50	325	374	241	419	258	367
ENSG00000018236	CNTN1	0	0	0	0	0	0	0	0	0	0
ENSG00000018280	SLC11A1	18079	14885	138	195	3536	5578	9244	4801	15188	7111
ENSG00000018408	WWTR1	12	11	0	12	2	8	6	9	4	15
ENSG00000018510	AGPS	574	458	30	86	412	410	290	559	321	413
ENSG00000018607	ZNF806	0	0	0	0	0	0	0	0	0	0
ENSG00000018610	CXorf56	301	321	0	29	199	187	163	184	195	222
ENSG00000018625	ATP1A2	0	0	0	0	4	2	0	0	1	0
ENSG00000018699	TTC27	298	346	12	8	186	179	138	175	108	189
ENSG00000018869	ZNF582	54	63	0	16	35	33	42	36	35	46
ENSG00000019102	VSIG2	102	156	36	229	89	175	150	42	94	43
ENSG00000019144	PHLDB1	16	8	11	0	15	7	10	23	12	17
ENSG00000019169	MARCO	195	436	0	12	95	261	249	423	230	132
ENSG00000019186	CYP24A1	1	2	0	0	1	0	1	2	0	5
ENSG00000019485	PRDM11	185	129	0	28	141	119	120	166	85	91
ENSG00000019505	SYT13	0	0	0	0	0	0	0	0	0	0
ENSG00000019549	SNAI2	1	0	0	0	0	0	0	0	0	0
ENSG00000019582	CD74	57604	64966	2030	2669	51525	64520	56311	56201	38271	39356
ENSG00000019991	HGF	224	191	0	0	51	60	26	65	83	59
ENSG00000019995	ZRANB1	1336	1404	0	54	676	626	586	602	854	559
ENSG00000020129	NCDN	282	304	0	86	335	329	391	422	358	349
ENSG00000020181	ADGRA2	340	287	0	27	146	281	186	223	193	149
ENSG00000020219	CCT8L1P	0	0	0	0	0	0	0	2	1	0
ENSG00000020256	ZFP64	132	157	0	0	170	155	132	175	83	119
ENSG00000020426	MNAT1	108	78	15	14	55	51	43	58	23	48
ENSG00000020577	SAMD4A	47	101	0	9	44	58	55	156	57	68
ENSG00000020633	RUNX3	4448	3690	145	668	3197	5016	2953	4126	1830	2858
ENSG00000020922	MRE11	443	346	4	84	461	405	384	434	406	516
ENSG00000021300	PLEKHB1	182	295	2	91	430	307	210	327	269	399
ENSG00000021355	SERPINB1	7408	6293	112	551	2430	3771	3422	3039	4806	3238
ENSG00000021461	CYP3A43	0	0	0	0	0	0	0	0	0	0
ENSG00000021488	SLC7A9	1	0	0	0	7	12	6	4	3	2
ENSG00000021574	SPAST	520	543	4	79	373	310	308	406	478	430
ENSG00000021645	NRXN3	0	0	0	0	0	1	0	0	0	0
ENSG00000021762	OSBPL5	720	518	1	57	781	1058	932	1272	639	544
ENSG00000021776	AQR	902	924	13	192	626	579	491	739	551	615
ENSG00000021826	CPS1	3	5	0	0	2	1	1	2	2	3
ENSG00000021852	C8B	0	0	0	0	0	0	0	0	3	0
ENSG00000022267	FHL1	156	286	30	134	138	225	174	228	170	162
ENSG00000022277	RTF2	2821	3294	54	322	1297	1683	2119	1494	2747	1480
ENSG00000022355	GABRA1	0	0	0	2	0	0	0	0	0	0
ENSG00000022556	NLRP2	160	64	0	12	217	359	214	256	199	209
ENSG00000022567	SLC45A4	2628	2438	21	115	1351	1371	2721	1111	3044	1131
ENSG00000022840	RNF10	5163	5101	83	434	4312	4459	4354	3345	4086	3273
ENSG00000022976	ZNF839	450	477	13	156	358	460	445	415	464	477
ENSG00000023041	ZDHHC6	1286	1348	54	160	588	760	562	731	603	810
ENSG00000023171	GRAMD1B	202	313	8	9	182	189	322	390	294	383
ENSG00000023191	RNH1	2675	2307	96	333	2679	3532	2869	3071	2210	2426
ENSG00000023228	NDUFS1	1018	928	25	149	588	535	501	691	512	647
ENSG00000023287	RB1CC1	1676	1447	25	87	514	360	378	559	566	605
ENSG00000023318	ERP44	1691	2302	68	138	936	1074	1027	1230	1321	1071
ENSG00000023330	ALAS1	776	950	17	116	561	642	643	690	881	579
ENSG00000023445	BIRC3	1598	2016	83	516	836	669	624	1010	660	1602
ENSG00000023516	AKAP11	720	683	0	13	528	437	254	633	296	580
ENSG00000023572	GLRX2	149	164	10	39	268	319	186	297	247	292
ENSG00000023608	SNAPC1	76	76	0	5	22	28	17	31	24	33
ENSG00000023697	DERA	397	363	0	33	209	218	198	258	167	204
ENSG00000023734	STRAP	1416	1485	21	167	865	918	690	963	662	748
ENSG00000023839	ABCC2	158	124	0	11	48	45	48	59	75	54
ENSG00000023892	DEF6	3244	3574	174	793	3386	3836	5112	4247	4423	3570
ENSG00000023902	PLEKHO1	4224	5596	178	1048	2696	3905	4358	3926	5108	3322
ENSG00000023909	GCLM	173	105	0	31	165	181	131	210	136	193
ENSG00000024048	UBR2	4407	4395	22	201	1532	1716	2184	1813	3279	1993
ENSG00000024422	EHD2	4	3	0	6	1	9	12	2	10	1
ENSG00000024526	DEPDC1	0	5	0	7	2	3	0	9	5	7
ENSG00000024862	CCDC28A	669	727	8	147	475	665	500	541	706	568
ENSG00000025039	RRAGD	531	749	26	25	180	222	254	193	504	248
ENSG00000025156	HSF2	190	136	1	66	260	207	116	231	162	249
ENSG00000025293	PHF20	1725	1674	32	123	799	708	798	929	817	721
ENSG00000025423	HSD17B6	34	29	0	0	8	12	12	20	4	18
ENSG00000025434	NR1H3	147	119	0	45	149	192	134	195	172	146
ENSG00000025708	TYMP	6307	8761	64	104	3806	4271	5518	6225	8458	4809
ENSG00000025770	NCAPH2	1322	1733	0	163	785	939	1042	911	917	882
ENSG00000025772	TOMM34	239	284	23	24	270	339	310	335	194	209
ENSG00000025796	SEC63	1235	1246	57	117	581	577	391	581	386	603
ENSG00000025800	KPNA6	942	908	34	132	858	845	820	1040	947	852
ENSG00000026025	VIM	37719	32270	763	2801	12818	22615	18185	14842	20874	14832
ENSG00000026036	RTEL1-TNFRSF6B	37	23	0	23	37	24	41	38	37	81
ENSG00000026103	FAS	1468	1567	46	82	460	564	427	581	707	1027
ENSG00000026297	RNASET2	3805	4289	96	405	1987	2406	5194	1858	4476	2472
ENSG00000026508	CD44	14515	12460	173	1030	4850	7062	5068	6721	6137	6530
ENSG00000026559	KCNG1	22	25	0	0	19	18	37	34	28	43
ENSG00000026652	AGPAT4	459	250	27	60	143	308	262	319	189	193
ENSG00000026751	SLAMF7	1400	1112	70	201	828	1475	757	1890	514	1230
ENSG00000026950	BTN3A1	4459	6019	88	857	3376	3422	4377	5896	4392	5404
ENSG00000027001	MIPEP	85	93	0	13	80	111	71	80	50	86
ENSG00000027075	PRKCH	1913	1690	77	397	1672	1932	1044	2089	958	1818
ENSG00000027644	INSRR	7	1	0	0	0	2	2	6	1	1
ENSG00000027697	IFNGR1	4002	4186	71	121	2415	2833	2549	2604	4421	3358
ENSG00000027847	B4GALT7	241	215	14	54	329	425	462	428	269	380
ENSG00000027869	SH2D2A	602	319	43	205	434	1089	751	967	557	501
ENSG00000028116	VRK2	370	385	17	35	203	147	161	287	157	191
ENSG00000028137	TNFRSF1B	16750	18096	327	886	8316	14442	15540	13534	19019	8954
ENSG00000028203	VEZT	553	450	11	46	261	185	118	319	123	302
ENSG00000028277	POU2F2	2661	2955	34	152	1768	2411	2185	2268	1751	1804
ENSG00000028310	BRD9	1005	848	34	206	708	735	699	885	643	778
ENSG00000028528	SNX1	2515	2432	57	354	1959	2184	2354	2411	2487	1983
ENSG00000028839	TBPL1	332	395	27	131	262	289	184	311	254	314
ENSG00000029153	ARNTL2	18	23	0	0	5	8	3	12	5	14
ENSG00000029363	BCLAF1	3660	3484	60	263	1627	1360	1113	1694	1478	1851
ENSG00000029364	SLC39A9	908	894	45	200	900	902	707	930	951	868
ENSG00000029534	ANK1	87	112	2	76	385	188	214	131	139	127
ENSG00000029559	IBSP	0	0	0	0	0	0	0	0	0	0
ENSG00000029639	TFB1M	151	133	0	46	127	187	147	188	105	142
ENSG00000029725	RABEP1	1279	1407	25	148	848	693	634	947	688	942
ENSG00000029993	HMGB3	107	99	1	9	13	20	23	27	26	27
ENSG00000030066	NUP160	751	625	11	69	622	494	344	628	424	609
ENSG00000030110	BAK1	963	960	24	149	701	847	895	1016	786	807
ENSG00000030304	MUSK	1	5	0	0	0	0	0	0	0	0
ENSG00000030419	IKZF2	534	220	9	20	306	228	174	486	148	174
ENSG00000030582	GRN	13866	15990	304	330	7084	12106	13087	9093	15682	7015
ENSG00000031003	FAM13B	1334	1608	27	153	715	491	461	714	572	704
ENSG00000031081	ARHGAP31	776	733	9	27	216	236	202	265	175	213
ENSG00000031691	CENPQ	83	65	0	0	20	27	9	21	20	41
ENSG00000031698	SARS	2068	2120	101	470	1575	2172	1841	2008	1612	1562
ENSG00000031823	RANBP3	819	953	13	197	1195	1278	1420	1469	1391	1247
ENSG00000032219	ARID4A	1742	1887	10	41	474	392	338	544	523	527
ENSG00000032389	EIPR1	310	356	0	85	284	351	295	384	237	284
ENSG00000032444	PNPLA6	1784	1700	45	143	2127	1952	2685	2262	2443	1656
ENSG00000032742	IFT88	208	199	4	50	108	78	62	96	112	107
ENSG00000033011	ALG1	278	290	2	58	342	459	341	398	256	324
ENSG00000033030	ZCCHC8	735	728	31	99	462	482	385	580	466	545
ENSG00000033050	ABCF2	176	179	4	44	163	243	175	214	167	187
ENSG00000033100	CHPF2	1778	1886	12	176	1081	1066	1497	1218	1520	1135
ENSG00000033122	LRRC7	27	19	0	0	26	17	7	13	10	13
ENSG00000033170	FUT8	128	164	0	42	163	143	124	245	95	196
ENSG00000033178	UBA6	487	460	17	77	436	342	281	568	333	528
ENSG00000033327	GAB2	6250	6309	26	124	1118	1590	2339	1787	4469	1789
ENSG00000033627	ATP6V0A1	1295	1512	22	82	707	914	1216	872	2105	929
ENSG00000033800	PIAS1	2249	2485	64	120	1452	1388	1481	1424	2002	1349
ENSG00000033867	SLC4A7	365	367	13	62	367	207	115	423	152	444
ENSG00000034053	APBA2	349	365	6	134	902	751	421	812	578	817
ENSG00000034152	MAP2K3	4112	4293	131	463	2649	3674	4085	2631	4157	2223
ENSG00000034239	EFCAB1	1	4	0	0	1	1	3	0	12	2
ENSG00000034510	TMSB10	19293	26238	1142	9146	12767	17565	12309	16905	9462	14193
ENSG00000034533	ASTE1	223	173	0	126	281	306	295	334	258	295
ENSG00000034677	RNF19A	1369	1477	33	132	557	424	365	788	433	659
ENSG00000034693	PEX3	87	104	13	15	114	66	45	105	44	80
ENSG00000034713	GABARAPL2	2448	2405	36	358	1211	1539	1536	1325	1890	1342
ENSG00000034971	MYOC	0	0	0	0	0	0	0	0	0	0
ENSG00000035115	SH3YL1	320	319	14	112	334	358	183	465	223	492
ENSG00000035141	FAM136A	561	482	18	109	319	358	268	367	214	329
ENSG00000035403	VCL	3183	3543	247	736	1796	2504	2093	1993	2755	1612
ENSG00000035499	DEPDC1B	7	8	0	0	2	9	5	18	4	15
ENSG00000035664	DAPK2	1790	2101	21	32	724	496	1535	503	2220	537
ENSG00000035681	NSMAF	1695	1537	31	89	756	792	704	845	944	810
ENSG00000035687	ADSS	835	822	19	51	656	701	470	815	583	654
ENSG00000035720	STAP1	117	169	15	9	166	81	94	78	89	136
ENSG00000035862	TIMP2	3629	3959	19	187	1618	2621	2616	2026	3846	1910
ENSG00000035928	RFC1	640	687	23	108	585	488	428	694	392	592
ENSG00000036054	TBC1D23	395	437	0	63	405	332	291	454	425	500
ENSG00000036257	CUL3	1618	1594	55	201	970	1003	897	1009	1270	1130
ENSG00000036448	MYOM2	21	152	0	111	65	3480	39	34	200	44
ENSG00000036473	OTC	0	0	0	0	0	0	0	0	0	0
ENSG00000036530	CYP46A1	2	3	0	0	6	14	8	7	4	7
ENSG00000036549	AC118549.1	700	717	14	75	312	206	160	333	138	345
ENSG00000036565	SLC18A1	19	15	0	4	4	15	5	20	10	7
ENSG00000036672	USP2	0	0	0	0	0	0	0	4	1	2
ENSG00000036828	CASR	1	1	0	0	0	1	4	0	2	0
ENSG00000037042	TUBG2	119	111	5	27	104	142	117	131	76	101
ENSG00000037241	RPL26L1	173	213	24	84	44	43	29	56	21	35
ENSG00000037280	FLT4	63	25	14	7	78	54	192	150	90	97
ENSG00000037474	NSUN2	1470	1214	46	191	916	954	737	1000	644	1221
ENSG00000037637	FBXO42	689	773	0	141	525	621	626	591	625	533
ENSG00000037749	MFAP3	191	141	0	10	196	96	90	164	142	193
ENSG00000037757	MRI1	684	546	29	127	511	570	426	598	385	629
ENSG00000037897	METTL1	44	42	11	24	55	63	51	66	37	59
ENSG00000037965	HOXC8	0	0	0	0	0	0	0	0	0	0
ENSG00000038002	AGA	393	387	4	53	175	297	176	188	200	221
ENSG00000038210	PI4K2B	181	207	4	67	183	127	88	256	113	230
ENSG00000038219	BOD1L1	5670	5862	94	174	1042	945	1089	1120	2142	1330
ENSG00000038274	MAT2B	1835	2116	73	377	2213	2297	1603	2586	1774	2473
ENSG00000038295	TLL1	0	0	0	0	0	0	0	0	0	0
ENSG00000038358	EDC4	1186	1133	36	99	843	520	1078	1061	932	900
ENSG00000038382	TRIO	920	782	10	44	323	257	208	335	209	274
ENSG00000038427	VCAN	28082	19565	155	53	2598	5086	3034	2872	5440	3077
ENSG00000038532	CLEC16A	596	588	32	99	472	435	465	507	522	428
ENSG00000038945	MSR1	255	112	0	0	54	14	49	107	55	27
ENSG00000039068	CDH1	18	18	0	14	4	5	7	2	7	4
ENSG00000039123	MTREX	687	697	18	111	642	546	415	743	405	727
ENSG00000039139	DNAH5	0	0	0	5	0	0	0	0	0	0
ENSG00000039319	ZFYVE16	1333	1128	20	65	355	304	299	426	644	540
ENSG00000039523	RIPOR1	2172	2406	48	152	1185	1445	1739	1308	2085	1141
ENSG00000039537	C6	0	0	0	0	0	0	0	0	0	0
ENSG00000039560	RAI14	10	30	6	15	1	6	0	9	3	4
ENSG00000039600	SOX30	2	8	0	0	4	1	0	1	6	7
ENSG00000039650	PNKP	1799	1448	23	398	931	1066	1478	1218	1510	1125
ENSG00000039987	BEST2	1	1	0	0	2	2	4	0	2	0
ENSG00000040199	PHLPP2	250	280	10	61	145	105	63	135	64	110
ENSG00000040275	SPDL1	111	108	22	35	64	48	40	98	39	90
ENSG00000040341	STAU2	307	327	3	30	216	208	160	269	191	208
ENSG00000040487	PQLC2	188	223	0	17	182	218	281	154	241	146
ENSG00000040531	CTNS	317	325	10	46	302	320	324	329	314	253
ENSG00000040608	RTN4R	5	7	0	4	34	35	28	42	20	42
ENSG00000040633	PHF23	799	800	26	102	681	1017	801	809	1009	721
ENSG00000040731	CDH10	0	0	0	0	0	0	0	0	0	0
ENSG00000040933	INPP4A	2323	2204	51	240	1745	1994	1363	2444	1711	2088
ENSG00000041353	RAB27B	101	105	21	81	116	132	51	140	66	83
ENSG00000041357	PSMA4	2087	2421	132	269	728	606	568	838	612	889
ENSG00000041515	MYO16	9	12	0	0	4	3	3	3	4	2
ENSG00000041802	LSG1	1068	590	14	126	506	584	529	607	370	495
ENSG00000041880	PARP3	209	216	13	90	142	181	198	253	118	180
ENSG00000041982	TNC	12	12	6	0	1	0	4	3	8	4
ENSG00000041988	THAP3	431	453	14	170	537	697	562	587	433	557
ENSG00000042062	RIPOR3	39	19	0	30	31	15	38	32	20	31
ENSG00000042088	TDP1	442	365	0	122	346	331	300	402	243	295
ENSG00000042286	AIFM2	76	48	13	19	96	127	104	111	71	122
ENSG00000042304	C2orf83	0	0	0	0	0	1	0	0	0	0
ENSG00000042317	AL049834.1	65	31	1	13	23	23	30	25	24	15
ENSG00000042429	MED17	113	134	4	31	94	97	85	108	92	94
ENSG00000042445	RETSAT	623	572	37	69	317	359	355	519	482	453
ENSG00000042493	CAPG	2224	2994	28	228	1996	3203	2520	2107	2019	1722
ENSG00000042753	AP2S1	1054	1083	108	207	751	1072	1024	893	713	746
ENSG00000042781	USH2A	1	1	0	0	0	0	0	0	0	1
ENSG00000042813	ZPBP	0	0	0	0	0	0	1	0	0	0
ENSG00000042832	TG	130	118	0	0	10	18	23	32	28	37
ENSG00000042980	ADAM28	410	641	0	0	318	214	334	183	350	400
ENSG00000043039	BARX2	0	0	0	2	0	0	0	0	1	1
ENSG00000043093	DCUN1D1	480	420	0	67	453	297	241	353	344	369
ENSG00000043143	JADE2	2034	2247	94	422	2021	1580	1520	2196	1307	1622
ENSG00000043355	ZIC2	0	0	0	0	0	0	0	0	0	0
ENSG00000043462	LCP2	8612	11097	319	756	3715	4710	4560	5206	5622	4405
ENSG00000043514	TRIT1	216	192	25	87	178	268	161	269	159	206
ENSG00000043591	ADRB1	25	25	0	0	4	3	1	11	5	7
ENSG00000044012	GUCA2B	0	0	0	0	0	0	0	0	0	0
ENSG00000044090	CUL7	468	445	0	39	398	365	429	486	421	378
ENSG00000044115	CTNNA1	3150	3248	51	67	1028	1430	1478	1210	1677	889
ENSG00000044446	PHKA2	1767	1539	42	191	1155	908	1037	1024	1629	965
ENSG00000044459	CNTLN	114	129	0	0	26	39	24	29	26	26
ENSG00000044524	EPHA3	0	0	3	0	0	0	0	0	0	0
ENSG00000044574	HSPA5	17922	18817	128	672	2379	3154	3269	3039	3829	2981
ENSG00000046604	DSG2	6	8	10	0	4	1	1	1	2	0
ENSG00000046647	GEMIN8	121	146	0	76	124	188	121	191	97	160
ENSG00000046651	OFD1	1145	1069	61	338	565	600	500	608	503	846
ENSG00000046653	GPM6B	14	22	0	0	37	40	20	59	35	52
ENSG00000046774	MAGEC2	0	0	0	0	0	0	0	0	0	0
ENSG00000046889	PREX2	0	0	0	0	0	0	0	0	1	0
ENSG00000047056	WDR37	905	729	23	178	962	950	814	1141	855	1020
ENSG00000047188	YTHDC2	655	685	8	88	436	355	219	540	323	547
ENSG00000047230	CTPS2	139	115	21	57	100	88	57	103	58	74
ENSG00000047249	ATP6V1H	518	572	5	84	369	500	470	430	445	396
ENSG00000047315	POLR2B	1919	1828	25	326	1574	1401	1228	1696	1372	1573
ENSG00000047346	FAM214A	1158	1248	43	128	477	401	357	504	467	629
ENSG00000047365	ARAP2	1446	1441	18	57	479	503	320	846	349	737
ENSG00000047410	TPR	5642	5240	145	571	1488	1392	1727	1721	1802	1718
ENSG00000047457	CP	231	189	0	48	164	192	144	192	180	163
ENSG00000047578	KIAA0556	953	696	19	103	412	406	552	527	725	485
ENSG00000047579	DTNBP1	475	547	13	83	271	380	325	368	267	335
ENSG00000047597	XK	33	48	18	27	131	91	25	45	27	36
ENSG00000047617	ANO2	1	2	0	22	3	3	0	5	1	1
ENSG00000047621	C12orf4	261	239	12	33	126	143	103	234	130	189
ENSG00000047634	SCML1	75	58	0	14	141	55	22	160	56	141
ENSG00000047644	WWC3	2734	2592	6	101	1129	1273	1652	1498	2338	1497
ENSG00000047648	ARHGAP6	39	44	1	31	21	17	16	19	15	19
ENSG00000047662	FAM184B	149	159	9	28	317	299	289	484	413	463
ENSG00000047849	MAP4	1824	1806	70	232	708	831	884	1111	738	813
ENSG00000047932	GOPC	492	448	8	51	425	322	203	528	253	490
ENSG00000047936	ROS1	0	0	0	0	0	0	0	0	0	0
ENSG00000048028	USP28	811	611	37	53	476	601	341	756	290	502
ENSG00000048052	HDAC9	413	558	33	37	296	186	111	208	145	249
ENSG00000048140	TSPAN17	686	746	39	142	564	793	761	1033	542	757
ENSG00000048162	NOP16	866	962	23	176	763	1147	850	1179	643	838
ENSG00000048342	CC2D2A	108	66	0	0	22	17	33	29	57	32
ENSG00000048392	RRM2B	749	859	0	50	478	361	353	453	653	601
ENSG00000048405	ZNF800	747	761	11	53	380	399	303	501	270	389
ENSG00000048462	TNFRSF17	27	21	0	9	31	31	27	29	14	72
ENSG00000048471	SNX29	1151	940	7	120	644	383	402	612	446	402
ENSG00000048540	LMO3	0	0	0	0	0	0	2	0	0	1
ENSG00000048544	MRPS10	439	453	18	69	362	317	231	403	230	298
ENSG00000048545	GUCA1A	0	0	0	0	0	0	0	0	0	0
ENSG00000048649	RSF1	1192	1125	15	133	447	397	377	482	426	466
ENSG00000048707	VPS13D	1837	1532	55	139	791	726	650	953	721	747
ENSG00000048740	CELF2	6148	6691	111	665	4369	4837	4328	5175	6671	5010
ENSG00000048828	FAM120A	4960	4713	133	233	2198	2488	2052	2785	3228	2328
ENSG00000048991	R3HDM1	653	679	21	99	331	342	241	465	276	291
ENSG00000049089	COL9A2	334	406	4	6	410	264	420	209	347	210
ENSG00000049130	KITLG	4	5	0	0	1	0	6	1	0	2
ENSG00000049167	ERCC8	124	95	0	0	55	41	36	55	47	54
ENSG00000049192	ADAMTS6	46	31	1	0	12	5	5	17	9	10
ENSG00000049239	H6PD	1355	1201	38	197	1121	980	1257	1150	1100	848
ENSG00000049245	VAMP3	2590	2329	56	137	995	1596	1312	1405	1695	1297
ENSG00000049246	PER3	233	89	9	23	99	113	49	86	44	116
ENSG00000049247	UTS2	631	25	19	0	13	36	24	37	15	33
ENSG00000049249	TNFRSF9	395	449	0	8	52	80	124	91	210	69
ENSG00000049283	EPN3	1	0	0	0	4	0	2	3	1	1
ENSG00000049323	LTBP1	82	107	28	64	22	34	29	12	27	5
ENSG00000049449	RCN1	69	70	0	52	52	112	39	90	28	102
ENSG00000049540	ELN	3	0	0	4	0	0	1	1	0	0
ENSG00000049541	RFC2	564	549	2	63	228	355	326	298	334	261
ENSG00000049618	ARID1B	1782	1695	18	209	842	619	575	1000	650	712
ENSG00000049656	CLPTM1L	1343	1213	29	258	1105	1288	1241	1400	1039	1305
ENSG00000049759	NEDD4L	85	90	0	15	101	90	32	53	52	37
ENSG00000049768	FOXP3	163	273	0	123	141	208	136	166	148	138
ENSG00000049769	PPP1R3F	86	87	0	16	107	97	123	103	87	120
ENSG00000049860	HEXB	2907	2835	31	102	967	1424	1121	999	1476	1144
ENSG00000049883	PTCD2	158	156	14	13	133	97	66	167	93	153
ENSG00000050030	NEXMIF	13	4	0	0	17	2	4	10	4	5
ENSG00000050130	JKAMP	769	829	12	43	410	436	390	485	513	519
ENSG00000050165	DKK3	5	14	0	5	4	39	10	4	10	9
ENSG00000050327	ARHGEF5	31	41	0	18	32	36	32	39	24	25
ENSG00000050344	NFE2L3	205	205	4	59	179	153	124	229	217	265
ENSG00000050393	MCUR1	249	267	32	85	172	120	118	161	87	142
ENSG00000050405	LIMA1	305	325	0	62	133	146	95	238	88	169
ENSG00000050426	LETMD1	972	992	4	170	850	946	738	990	695	1065
ENSG00000050438	SLC4A8	146	111	0	0	93	122	72	127	77	106
ENSG00000050555	LAMC3	13	11	6	16	20	31	26	10	18	13
ENSG00000050628	PTGER3	11	5	0	0	4	1	2	4	3	0
ENSG00000050730	TNIP3	43	17	0	0	2	1	5	2	4	7
ENSG00000050748	MAPK9	776	621	19	66	354	401	242	399	273	389
ENSG00000050767	COL23A1	8	19	0	10	3	10	1	2	3	5
ENSG00000050820	BCAR1	0	0	1	9	0	0	1	0	0	0
ENSG00000051009	FAM160A2	2083	1673	31	179	891	1136	1389	1195	1775	1182
ENSG00000051108	HERPUD1	2702	2759	15	189	1372	1912	1812	1585	2017	1682
ENSG00000051128	HOMER3	157	189	11	19	65	131	135	91	197	71
ENSG00000051180	RAD51	39	21	0	0	17	25	16	44	13	31
ENSG00000051341	POLQ	32	28	0	0	7	11	4	27	6	12
ENSG00000051382	PIK3CB	709	854	0	67	474	418	460	467	623	454
ENSG00000051523	CYBA	6280	6570	153	586	7428	9963	11890	8532	11394	8035
ENSG00000051596	THOC3	74	75	6	55	138	71	75	114	39	114
ENSG00000051620	HEBP2	3306	2764	46	273	604	664	810	678	882	823
ENSG00000051825	MPHOSPH9	420	334	6	83	319	189	151	425	177	353
ENSG00000052126	PLEKHA5	87	144	0	23	36	23	18	38	22	37
ENSG00000052344	PRSS8	12	13	0	0	5	3	7	1	6	3
ENSG00000052723	SIKE1	462	451	8	32	432	342	253	449	277	438
ENSG00000052749	RRP12	2393	1791	13	103	637	1120	1491	744	1444	1020
ENSG00000052795	FNIP2	229	248	0	51	179	186	95	222	92	145
ENSG00000052802	MSMO1	87	92	0	41	175	209	144	230	119	212
ENSG00000052841	TTC17	2140	2000	19	184	925	976	813	1072	948	991
ENSG00000052850	ALX4	0	0	0	0	0	0	0	0	0	0
ENSG00000053108	FSTL4	3	6	13	11	4	4	6	9	3	6
ENSG00000053254	FOXN3	3160	3043	47	258	1407	1338	1209	1447	1513	1217
ENSG00000053328	METTL24	2	3	0	0	0	1	1	2	0	0
ENSG00000053371	AKR7A2	395	378	22	83	390	678	451	518	314	371
ENSG00000053372	MRTO4	290	338	5	79	238	298	253	313	169	273
ENSG00000053438	NNAT	63	58	0	0	26	10	11	37	22	40
ENSG00000053501	USE1	243	264	30	66	294	345	313	311	260	293
ENSG00000053524	MCF2L2	276	285	18	20	49	69	50	55	140	105
ENSG00000053702	NRIP2	151	125	13	0	102	60	81	105	72	114
ENSG00000053747	LAMA3	2	1	0	0	1	0	0	1	0	0
ENSG00000053770	AP5M1	529	568	10	99	514	475	382	602	488	644
ENSG00000053900	ANAPC4	683	694	0	150	383	404	317	507	368	537
ENSG00000053918	KCNQ1	1120	967	0	42	688	698	996	724	1066	611
ENSG00000054116	TRAPPC3	1173	1198	52	251	557	863	766	759	772	694
ENSG00000054118	THRAP3	3499	3504	109	463	1948	1965	2292	2335	2780	2016
ENSG00000054148	PHPT1	348	284	13	65	216	420	301	327	186	298
ENSG00000054179	ENTPD2	83	62	0	0	9	9	25	3	5	4
ENSG00000054219	LY75	334	175	0	37	371	393	220	396	329	329
ENSG00000054267	ARID4B	2914	2806	53	157	684	493	399	760	679	886
ENSG00000054277	OPN3	345	384	15	16	217	270	192	292	200	192
ENSG00000054282	SDCCAG8	597	593	23	33	182	212	154	238	217	181
ENSG00000054356	PTPRN	1	5	2	19	10	18	7	1	11	1
ENSG00000054392	HHAT	64	70	0	22	39	39	32	35	43	35
ENSG00000054523	KIF1B	910	780	22	62	457	461	582	433	696	531
ENSG00000054598	FOXC1	6	11	0	0	3	2	0	3	3	1
ENSG00000054611	TBC1D22A	1369	1311	20	181	786	938	1171	958	1116	770
ENSG00000054654	SYNE2	4180	5020	76	462	1363	1184	1186	1816	1291	1299
ENSG00000054690	PLEKHH1	39	46	14	11	48	58	36	31	29	48
ENSG00000054793	ATP9A	55	111	37	50	42	89	75	133	66	42
ENSG00000054796	SPO11	0	0	0	17	0	0	0	0	0	0
ENSG00000054803	CBLN4	0	0	0	0	0	0	0	0	0	0
ENSG00000054938	CHRDL2	0	1	0	0	0	0	0	0	0	0
ENSG00000054965	FAM168A	1512	1277	44	134	914	864	1165	1326	1876	1165
ENSG00000054967	RELT	5906	4621	40	62	1194	1555	2078	1511	2919	1458
ENSG00000054983	GALC	984	1037	51	67	559	611	395	668	491	586
ENSG00000055044	NOP58	1073	1149	72	300	475	388	300	492	278	559
ENSG00000055070	SZRD1	2915	3212	80	415	2347	2474	2709	3048	2369	2144
ENSG00000055118	KCNH2	31	36	0	0	116	54	71	50	74	69
ENSG00000055130	CUL1	1167	1495	21	160	804	806	668	1014	573	699
ENSG00000055147	FAM114A2	321	319	6	36	241	265	171	252	182	275
ENSG00000055163	CYFIP2	6370	6833	182	1062	4677	4602	4556	5484	4941	4889
ENSG00000055208	TAB2	5148	6580	96	395	1104	966	913	1235	1589	1361
ENSG00000055211	GINM1	549	631	4	34	264	303	347	306	329	315
ENSG00000055332	EIF2AK2	1279	4129	22	79	553	725	973	1236	2113	1034
ENSG00000055483	AC022966.1	1010	831	27	224	820	843	819	1084	700	894
ENSG00000055609	KMT2C	3177	2783	43	106	900	650	566	1014	993	961
ENSG00000055732	MCOLN3	9	21	0	0	4	4	3	13	9	20
ENSG00000055813	CCDC85A	0	0	0	0	0	0	0	0	0	0
ENSG00000055917	PUM2	2678	2851	61	242	2093	1817	1502	2258	1693	2259
ENSG00000055950	MRPL43	564	447	38	132	487	623	547	601	384	460
ENSG00000055955	ITIH4	16	12	0	12	13	9	12	15	24	10
ENSG00000055957	ITIH1	29	18	0	3	13	13	9	10	7	7
ENSG00000056050	HPF1	166	182	0	30	104	118	111	131	65	106
ENSG00000056097	ZFR	1326	1211	12	91	893	761	588	1118	696	916
ENSG00000056277	ZNF280C	59	68	14	4	37	41	21	57	27	48
ENSG00000056291	NPFFR2	0	0	0	14	0	0	0	0	1	0
ENSG00000056487	PHF21B	0	0	0	0	0	0	0	0	0	0
ENSG00000056558	TRAF1	1396	1244	15	703	1114	1297	1416	1894	907	1640
ENSG00000056586	RC3H2	1228	1037	24	163	613	628	532	850	628	759
ENSG00000056736	IL17RB	46	43	0	17	52	42	38	55	46	44
ENSG00000056972	TRAF3IP2	301	341	7	32	203	237	178	295	277	180
ENSG00000056998	GYG2	0	4	0	17	0	0	0	1	0	0
ENSG00000057019	DCBLD2	44	47	13	18	21	14	10	28	35	17
ENSG00000057149	SERPINB3	0	0	0	0	0	0	0	0	0	0
ENSG00000057252	SOAT1	1060	852	15	33	562	763	564	760	965	841
ENSG00000057294	PKP2	33	22	0	10	19	11	22	6	8	5
ENSG00000057468	MSH4	4	1	0	0	4	1	1	5	3	1
ENSG00000057593	F7	0	2	0	0	2	1	0	6	2	1
ENSG00000057608	GDI2	6417	7125	213	620	2860	3028	2500	3373	3144	2796
ENSG00000057657	PRDM1	754	974	18	118	491	578	450	613	456	753
ENSG00000057663	ATG5	670	706	19	56	278	231	199	286	197	266
ENSG00000057704	TMCC3	1480	1755	18	97	505	582	1032	472	1662	492
ENSG00000057757	PITHD1	861	968	57	106	581	729	575	643	524	618
ENSG00000057935	MTA3	226	224	37	9	223	171	172	264	141	236
ENSG00000058056	USP13	144	132	9	29	91	47	39	93	43	83
ENSG00000058063	ATP11B	2551	2297	56	135	1061	847	708	1213	1109	1445
ENSG00000058085	LAMC2	0	1	0	0	0	0	0	0	0	0
ENSG00000058091	CDK14	384	568	0	8	152	87	152	112	268	176
ENSG00000058262	SEC61A1	3250	3634	112	546	2467	3064	3126	3074	2702	2612
ENSG00000058272	PPP1R12A	2813	2740	53	159	1044	802	652	1203	1112	1359
ENSG00000058335	RASGRF1	17	5	6	0	4	2	8	6	2	7
ENSG00000058404	CAMK2B	1	0	0	0	0	3	0	1	1	0
ENSG00000058453	CROCC	446	406	7	192	547	483	588	717	414	682
ENSG00000058600	POLR3E	579	572	42	100	539	522	399	698	326	619
ENSG00000058668	ATP2B4	3828	2792	117	347	1134	1737	1398	2084	1344	1495
ENSG00000058673	ZC3H11A	3	1	0	0	1	0	2	1	3	0
ENSG00000058729	RIOK2	298	273	43	92	246	177	136	221	152	269
ENSG00000058799	YIPF1	977	1073	33	66	446	785	843	613	971	631
ENSG00000058804	NDC1	196	209	0	32	211	198	119	240	113	200
ENSG00000058866	DGKG	331	275	2	26	73	111	158	65	214	64
ENSG00000059122	FLYWCH1	721	585	24	123	1570	649	1193	793	506	1878
ENSG00000059145	UNKL	634	587	14	107	667	604	766	707	895	940
ENSG00000059377	TBXAS1	5543	4982	116	177	1852	2722	4135	2128	4643	1674
ENSG00000059378	PARP12	1470	3345	29	456	1277	1447	1545	1703	1774	1631
ENSG00000059573	ALDH18A1	414	451	15	82	308	320	267	357	233	325
ENSG00000059588	TARBP1	528	507	15	48	500	473	246	606	293	638
ENSG00000059691	GATB	233	218	0	36	186	157	115	207	134	159
ENSG00000059728	MXD1	12818	13739	119	416	4744	7728	9299	5791	19894	8921
ENSG00000059758	CDK17	665	750	21	34	476	303	200	568	304	414
ENSG00000059769	DNAJC25	134	169	0	0	38	48	21	41	30	43
ENSG00000059804	SLC2A3	21084	18448	93	493	1641	2793	2640	2821	6251	3617
ENSG00000059915	PSD	143	78	0	16	111	109	102	113	81	135
ENSG00000060069	CTDP1	713	796	18	76	591	713	891	672	820	701
ENSG00000060138	YBX3	2534	2137	66	147	4794	3445	2440	2340	2092	1478
ENSG00000060140	STYK1	68	68	0	3	18	12	24	13	9	18
ENSG00000060237	WNK1	5402	5713	123	471	1986	1773	1872	2096	2257	1729
ENSG00000060303	RPS17P5	0	1	0	0	0	0	0	0	0	0
ENSG00000060339	CCAR1	1167	1086	32	170	590	408	349	688	346	690
ENSG00000060491	OGFR	1882	2032	20	196	1873	1715	2717	2065	2772	2141
ENSG00000060558	GNA15	614	605	20	27	303	532	514	344	407	248
ENSG00000060566	CREB3L3	0	3	0	0	0	2	2	2	4	2
ENSG00000060642	PIGV	184	195	0	59	205	329	275	313	274	292
ENSG00000060656	PTPRU	23	6	0	0	6	11	2	7	2	3
ENSG00000060688	SNRNP40	397	411	25	141	601	724	568	674	411	622
ENSG00000060709	RIMBP2	2	12	0	0	58	0	0	32	12	0
ENSG00000060718	COL11A1	0	0	9	0	0	0	0	0	0	0
ENSG00000060749	QSER1	300	230	0	7	161	141	93	243	126	175
ENSG00000060762	MPC1	449	398	0	108	310	423	229	373	262	258
ENSG00000060971	ACAA1	3031	3221	86	310	1407	2313	2414	2081	2809	1945
ENSG00000060982	BCAT1	125	69	4	1	70	55	72	68	64	49
ENSG00000061273	HDAC7	4874	4382	74	636	2815	3342	4026	3669	4583	3518
ENSG00000061337	LZTS1	11	19	0	0	13	7	5	10	5	6
ENSG00000061455	PRDM6	0	0	0	0	0	0	1	0	0	0
ENSG00000061492	WNT8A	0	0	0	0	1	0	0	0	0	0
ENSG00000061656	SPAG4	30	18	0	8	6	4	8	12	3	10
ENSG00000061676	NCKAP1	52	53	32	0	36	43	23	46	24	32
ENSG00000061794	MRPS35	475	545	12	81	342	410	239	450	235	380
ENSG00000061918	GUCY1B1	67	59	16	64	46	68	48	55	30	25
ENSG00000061936	SFSWAP	1710	1544	62	262	790	719	782	814	767	805
ENSG00000061938	TNK2	3092	3563	54	420	2406	2292	3327	2625	3483	2728
ENSG00000061987	MON2	1131	1117	23	60	676	580	453	744	619	798
ENSG00000062038	CDH3	0	1	15	0	1	1	2	2	3	2
ENSG00000062096	ARSF	0	0	0	0	0	0	0	0	0	0
ENSG00000062194	GPBP1	2568	3068	33	287	1186	999	893	1274	1229	1385
ENSG00000062282	DGAT2	4090	3694	51	66	1363	2717	3556	1537	5341	2214
ENSG00000062370	ZNF112	6	3	0	7	2	0	2	4	1	2
ENSG00000062485	CS	2267	2196	58	240	1809	1828	1624	1691	1456	1449
ENSG00000062524	LTK	102	105	82	106	146	572	385	276	214	151
ENSG00000062582	MRPS24	4	5	0	15	4	2	4	5	7	15
ENSG00000062598	ELMO2	1210	1445	28	229	1122	1322	1136	1494	1268	1103
ENSG00000062650	WAPL	2158	2137	23	212	822	702	661	939	825	1024
ENSG00000062716	VMP1	13650	14692	182	387	3864	5284	7371	4297	10881	4965
ENSG00000062725	APPBP2	521	586	22	28	357	334	265	388	342	428
ENSG00000062822	POLD1	253	216	0	51	306	242	338	410	282	346
ENSG00000063015	SEZ6	7	9	0	0	3	1	4	5	6	1
ENSG00000063046	EIF4B	13469	11178	304	1272	6793	4181	3801	4889	3685	5638
ENSG00000063127	SLC6A16	84	119	0	42	115	108	88	103	71	117
ENSG00000063169	BICRA	311	342	31	75	218	206	253	292	299	269
ENSG00000063176	SPHK2	243	207	6	60	281	338	338	342	294	340
ENSG00000063177	RPL18	12558	11900	716	5127	12322	13548	9994	12369	7916	11429
ENSG00000063180	CA11	113	116	9	43	74	162	101	111	95	97
ENSG00000063241	ISOC2	84	100	6	28	190	278	172	229	117	192
ENSG00000063244	U2AF2	3846	4072	116	672	2372	2869	2940	3052	2639	2542
ENSG00000063245	EPN1	1273	1346	44	178	1193	1346	2010	1372	1587	1306
ENSG00000063322	MED29	1134	1094	46	175	784	776	866	969	774	743
ENSG00000063438	AHRR	0	0	0	0	0	3	0	0	1	0
ENSG00000063515	GSC2	0	0	0	0	0	0	1	0	0	0
ENSG00000063587	ZNF275	226	160	7	42	376	261	229	416	173	329
ENSG00000063601	MTMR1	1018	937	21	121	779	679	556	807	564	790
ENSG00000063660	GPC1	11	10	0	12	11	21	11	15	9	10
ENSG00000063761	ADCK1	127	223	0	83	139	211	342	214	142	134
ENSG00000063854	HAGH	590	516	63	95	1512	1177	1148	955	815	738
ENSG00000063978	RNF4	1626	1610	31	233	1635	1929	1779	1988	1693	1570
ENSG00000064012	CASP8	5223	4023	48	786	2235	2448	2868	2357	3860	2419
ENSG00000064042	LIMCH1	8	14	0	0	2	1	1	1	0	2
ENSG00000064102	INTS13	290	329	1	72	206	212	152	288	144	268
ENSG00000064115	TM7SF3	928	849	18	73	445	613	409	588	446	596
ENSG00000064195	DLX3	0	0	0	0	0	0	1	0	0	0
ENSG00000064199	SPA17	37	37	0	8	4	9	8	8	11	8
ENSG00000064201	TSPAN32	1385	1005	67	250	1620	2164	1771	1851	1813	1823
ENSG00000064205	CCN5	0	0	0	0	0	1	0	0	0	1
ENSG00000064218	DMRT3	0	0	0	0	0	0	0	0	0	0
ENSG00000064225	ST3GAL6	412	628	28	15	182	171	129	196	335	231
ENSG00000064270	ATP2C2	28	105	0	1	15	23	28	11	24	30
ENSG00000064300	NGFR	3	11	0	0	3	7	1	12	4	6
ENSG00000064309	CDON	1	8	0	12	11	15	7	11	6	12
ENSG00000064313	TAF2	618	538	0	69	345	284	192	374	234	367
ENSG00000064393	HIPK2	724	656	42	118	589	687	310	582	453	328
ENSG00000064419	TNPO3	1282	1343	42	120	782	695	899	926	1238	849
ENSG00000064489	BORCS8-MEF2B	0	0	0	0	1	1	0	2	6	6
ENSG00000064490	RFXANK	815	867	31	226	740	1008	929	924	914	755
ENSG00000064545	TMEM161A	232	165	1	87	251	355	322	311	223	257
ENSG00000064547	LPAR2	5673	5500	39	359	1299	2500	4005	2472	6046	2108
ENSG00000064601	CTSA	3996	4035	241	1108	2323	3626	3546	2698	3555	2309
ENSG00000064607	SUGP2	2546	2149	72	415	1624	1834	1876	2378	1954	2014
ENSG00000064651	SLC12A2	109	96	0	0	92	53	49	101	37	79
ENSG00000064652	SNX24	57	51	0	9	24	49	30	43	24	26
ENSG00000064655	EYA2	2	2	0	0	0	4	0	3	0	0
ENSG00000064666	CNN2	13877	15827	387	2247	7603	11126	10438	9673	16439	8653
ENSG00000064687	ABCA7	6157	6792	79	668	3502	2584	5171	4062	9050	4828
ENSG00000064692	SNCAIP	4	0	0	0	0	2	0	1	3	0
ENSG00000064703	DDX20	429	406	23	49	323	258	256	347	249	269
ENSG00000064726	BTBD1	797	769	16	74	645	501	394	659	427	595
ENSG00000064763	FAR2	854	697	0	52	304	354	389	295	531	292
ENSG00000064787	BCAS1	66	45	0	0	15	21	32	24	73	23
ENSG00000064835	POU1F1	2	0	0	0	1	0	0	1	1	4
ENSG00000064886	CHI3L2	185	143	15	44	271	245	133	625	148	228
ENSG00000064932	SBNO2	4941	3932	75	238	2091	2009	4761	3054	5585	4173
ENSG00000064933	PMS1	307	288	37	34	177	136	106	232	91	188
ENSG00000064961	HMG20B	932	814	53	148	545	699	843	628	634	587
ENSG00000064989	CALCRL	26	11	0	0	13	16	9	8	9	20
ENSG00000064995	TAF11	792	726	31	108	351	414	293	407	327	470
ENSG00000064999	ANKS1A	432	472	15	71	429	405	520	482	698	383
ENSG00000065000	AP3D1	2613	2261	81	267	1779	1670	1967	1978	1980	1789
ENSG00000065029	ZNF76	837	790	28	245	790	817	771	993	633	924
ENSG00000065054	SLC9A3R2	23	28	0	0	53	63	42	44	36	34
ENSG00000065057	NTHL1	89	105	4	27	119	144	131	136	98	107
ENSG00000065060	UHRF1BP1	577	604	22	60	267	305	162	383	245	249
ENSG00000065135	GNAI3	3613	3951	45	134	1296	1485	1271	1452	1909	1505
ENSG00000065150	IPO5	1388	1274	90	98	924	797	643	1065	552	888
ENSG00000065154	OAT	1049	1020	7	100	483	520	461	602	597	539
ENSG00000065183	WDR3	341	293	15	94	377	304	276	442	218	367
ENSG00000065243	PKN2	1705	1545	35	33	725	509	499	730	1140	933
ENSG00000065268	WDR18	200	203	10	48	269	291	297	379	190	303
ENSG00000065308	TRAM2	543	453	8	77	348	374	273	446	313	392
ENSG00000065320	NTN1	5	3	0	0	4	2	6	10	2	4
ENSG00000065325	GLP2R	2	0	0	0	0	0	0	0	0	0
ENSG00000065328	MCM10	5	5	9	0	12	6	5	26	4	22
ENSG00000065357	DGKA	4114	4665	217	2048	3422	3538	3632	4545	3839	4605
ENSG00000065361	ERBB3	6	14	0	0	9	8	5	6	7	9
ENSG00000065371	ROPN1	0	0	0	0	0	0	0	0	0	0
ENSG00000065413	ANKRD44	3264	2814	57	220	2336	1613	1369	2648	2082	2775
ENSG00000065427	KARS	2830	3012	133	589	1968	1972	1955	2456	1652	1913
ENSG00000065457	ADAT1	485	368	30	56	205	220	228	341	228	246
ENSG00000065485	PDIA5	131	76	1	38	46	71	64	78	60	74
ENSG00000065491	TBC1D22B	358	366	28	79	319	225	210	301	227	218
ENSG00000065518	NDUFB4	714	771	16	189	537	767	531	598	501	535
ENSG00000065526	SPEN	4342	4405	56	180	1341	1043	1328	1577	1923	1179
ENSG00000065534	MYLK	126	162	42	233	88	124	111	112	77	54
ENSG00000065548	ZC3H15	1292	1307	35	133	442	335	276	456	315	521
ENSG00000065559	MAP2K4	1498	1694	31	156	491	500	586	471	727	520
ENSG00000065600	TMEM206	226	241	9	27	135	147	96	206	104	144
ENSG00000065609	SNAP91	0	0	0	0	0	1	0	0	0	0
ENSG00000065613	SLK	1883	1737	40	171	649	654	550	825	789	932
ENSG00000065615	CYB5R4	2701	2955	46	199	920	867	1082	899	1728	1158
ENSG00000065618	COL17A1	1	18	8	8	4	11	13	0	2	9
ENSG00000065621	GSTO2	194	197	0	4	11	21	49	27	36	18
ENSG00000065665	SEC61A2	546	498	31	95	276	302	338	310	394	352
ENSG00000065675	PRKCQ	700	722	35	297	557	665	499	981	369	679
ENSG00000065717	TLE2	69	77	4	68	172	165	113	142	115	161
ENSG00000065802	ASB1	553	490	38	70	688	637	558	852	549	682
ENSG00000065809	FAM107B	4466	4294	152	444	2081	1990	1528	2520	2040	2604
ENSG00000065833	ME1	31	23	0	9	17	24	18	15	11	9
ENSG00000065882	TBC1D1	3200	4053	76	219	1346	1243	1819	1387	2326	1251
ENSG00000065883	CDK13	1679	1774	28	176	834	864	709	991	847	844
ENSG00000065911	MTHFD2	566	667	13	79	353	355	230	544	275	475
ENSG00000065923	SLC9A7	348	324	13	21	249	179	160	163	199	204
ENSG00000065970	FOXJ2	1155	1488	54	178	586	699	734	592	806	568
ENSG00000065978	YBX1	7666	7296	327	1395	7229	4457	3969	4486	2860	3635
ENSG00000065989	PDE4A	406	370	2	28	232	392	308	378	253	318
ENSG00000066027	PPP2R5A	2503	4305	45	389	1201	1517	1409	1634	2073	1410
ENSG00000066032	CTNNA2	1	3	0	14	0	3	0	4	2	0
ENSG00000066044	ELAVL1	675	652	24	122	665	825	662	906	550	686
ENSG00000066056	TIE1	16	5	0	1	24	23	13	8	13	2
ENSG00000066084	DIP2B	1632	1760	14	85	761	778	869	876	1374	855
ENSG00000066117	SMARCD1	1348	1330	56	303	933	1120	1102	1178	960	957
ENSG00000066135	KDM4A	374	378	7	82	286	376	387	369	350	301
ENSG00000066136	NFYC	1631	1680	40	193	1013	1363	1478	1275	1857	1117
ENSG00000066185	ZMYND12	18	4	0	0	2	4	2	8	5	4
ENSG00000066230	SLC9A3	88	35	0	1	54	94	67	93	57	131
ENSG00000066248	NGEF	0	0	0	0	0	0	0	0	0	1
ENSG00000066279	ASPM	14	19	0	1	5	8	8	27	4	28
ENSG00000066294	CD84	1436	1174	28	143	796	567	504	1071	482	757
ENSG00000066322	ELOVL1	1751	1725	36	212	1015	1606	1470	1320	1558	1113
ENSG00000066336	SPI1	13978	14088	351	475	5496	9123	13295	6255	14340	6483
ENSG00000066379	ZNRD1	516	439	43	235	323	516	401	414	330	357
ENSG00000066382	MPPED2	2	5	0	0	6	7	6	7	2	0
ENSG00000066405	CLDN18	0	0	0	0	0	0	1	2	0	0
ENSG00000066422	ZBTB11	1011	887	27	76	592	391	276	679	338	643
ENSG00000066427	ATXN3	470	468	0	55	285	274	221	334	293	368
ENSG00000066455	GOLGA5	1008	973	4	125	331	348	346	440	389	335
ENSG00000066468	FGFR2	22	11	0	0	35	3	9	24	7	15
ENSG00000066557	LRRC40	91	122	0	60	134	103	60	151	56	136
ENSG00000066583	ISOC1	182	178	15	46	155	155	107	172	192	167
ENSG00000066629	EML1	2	0	0	23	0	0	2	0	0	0
ENSG00000066651	TRMT11	123	110	0	38	82	70	37	96	36	105
ENSG00000066654	THUMPD1	1682	1628	23	122	678	483	382	732	427	732
ENSG00000066697	MSANTD3	115	123	40	94	59	69	37	67	35	51
ENSG00000066735	KIF26A	6	4	0	0	7	0	1	10	3	4
ENSG00000066739	ATG2B	873	719	21	37	499	499	406	614	497	632
ENSG00000066777	ARFGEF1	1734	1609	47	101	1003	824	776	1158	1115	1069
ENSG00000066813	ACSM2B	0	0	0	0	0	0	0	0	0	0
ENSG00000066827	ZFAT	194	174	0	10	218	269	233	198	246	158
ENSG00000066855	MTFR1	427	368	0	42	289	167	168	333	262	350
ENSG00000066923	STAG3	233	304	7	25	190	184	222	237	232	171
ENSG00000066926	FECH	273	235	26	23	494	373	217	251	118	185
ENSG00000066933	MYO9A	487	510	1	8	223	211	146	239	134	216
ENSG00000067048	DDX3Y	4042	0	65	166	981	748	500	0	13	4
ENSG00000067057	PFKP	597	709	24	149	608	670	456	812	421	615
ENSG00000067064	IDI1	2218	2010	54	189	557	441	346	583	442	598
ENSG00000067066	SP100	5592	10140	166	428	1834	1959	1884	2591	2898	2048
ENSG00000067082	KLF6	21426	19501	218	1060	3079	3819	3459	3457	6234	4004
ENSG00000067113	PLPP1	98	139	0	29	105	113	63	114	89	159
ENSG00000067141	NEO1	285	158	1	57	70	49	70	83	45	44
ENSG00000067167	TRAM1	1663	1501	22	141	2082	1916	1201	2423	1303	2200
ENSG00000067177	PHKA1	3	2	0	0	3	0	1	1	0	3
ENSG00000067182	TNFRSF1A	5132	5402	65	215	2886	5071	6618	3975	8481	4022
ENSG00000067191	CACNB1	189	164	0	72	157	257	217	212	159	205
ENSG00000067208	EVI5	310	288	0	12	111	129	125	108	166	109
ENSG00000067221	STOML1	119	124	2	39	146	151	129	153	118	146
ENSG00000067225	PKM	11994	12513	477	2212	7700	11377	11261	10074	10797	7914
ENSG00000067248	DHX29	572	590	12	22	272	271	256	318	271	304
ENSG00000067334	DNTTIP2	2252	2426	13	176	425	393	334	525	398	503
ENSG00000067365	METTL22	397	413	34	22	194	204	203	266	267	208
ENSG00000067369	TP53BP1	1119	1013	15	208	468	419	465	587	531	510
ENSG00000067445	TRO	16	17	0	0	28	31	13	35	18	24
ENSG00000067533	RRP15	131	139	0	19	149	128	83	171	78	158
ENSG00000067560	RHOA	21261	20522	658	1905	8667	12011	10754	10047	12407	8706
ENSG00000067596	DHX8	1726	1803	33	212	944	1157	1278	1175	1507	1018
ENSG00000067601	PMS2P4	46	27	0	7	11	12	17	18	8	8
ENSG00000067606	PRKCZ	345	332	9	52	390	361	524	389	449	304
ENSG00000067646	ZFY	258	0	18	38	186	108	49	0	5	1
ENSG00000067704	IARS2	1512	1323	54	96	773	740	552	763	535	723
ENSG00000067715	SYT1	4	8	0	0	4	0	2	2	7	4
ENSG00000067798	NAV3	36	41	0	2	4	8	10	4	9	5
ENSG00000067829	IDH3G	1233	1149	41	165	957	1432	1223	1112	1014	858
ENSG00000067836	ROGDI	363	251	23	22	196	260	279	221	219	140
ENSG00000067840	PDZD4	819	588	32	252	668	1392	872	1034	623	593
ENSG00000067842	ATP2B3	0	0	0	0	0	0	0	0	0	0
ENSG00000067900	ROCK1	3686	3457	67	130	985	525	534	923	888	992
ENSG00000067955	CBFB	643	665	0	57	741	776	472	906	593	784
ENSG00000067992	PDK3	956	1133	16	192	808	1032	1068	917	1413	968
ENSG00000068001	HYAL2	158	159	5	9	105	183	144	150	163	139
ENSG00000068024	HDAC4	837	822	4	124	701	752	690	800	1048	963
ENSG00000068028	RASSF1	2668	2450	47	559	2103	3354	2964	3009	2197	2540
ENSG00000068078	FGFR3	1	3	0	2	5	1	0	0	2	2
ENSG00000068079	IFI35	751	1806	12	150	885	1359	1488	1710	1583	1228
ENSG00000068097	HEATR6	331	320	18	35	187	214	139	210	142	220
ENSG00000068120	COASY	1367	1392	24	265	969	1172	1363	1109	1317	1002
ENSG00000068137	PLEKHH3	11	12	0	0	8	10	11	12	8	10
ENSG00000068305	MEF2A	1515	1168	40	54	756	683	458	795	678	884
ENSG00000068308	OTUD5	2870	2923	65	456	1562	2286	2504	1752	2555	1900
ENSG00000068323	TFE3	4827	4729	62	262	1474	2343	2988	2023	3948	1874
ENSG00000068354	TBC1D25	550	540	5	75	483	593	616	529	505	486
ENSG00000068366	ACSL4	1609	1563	54	41	1022	690	578	1101	1085	1223
ENSG00000068383	INPP5A	743	603	15	65	297	401	498	306	628	259
ENSG00000068394	GPKOW	515	539	14	97	305	493	464	519	369	371
ENSG00000068400	GRIPAP1	1968	1930	61	209	1107	1290	1639	1639	1823	1575
ENSG00000068438	FTSJ1	670	651	4	172	495	594	449	545	309	506
ENSG00000068489	PRR11	159	156	14	19	70	68	65	126	58	73
ENSG00000068615	REEP1	3	3	0	69	2	2	2	0	2	3
ENSG00000068650	ATP11A	2532	2136	11	82	783	733	764	1063	1141	755
ENSG00000068654	POLR1A	376	338	46	60	242	299	232	380	272	292
ENSG00000068697	LAPTM4A	2919	2902	40	71	1221	1621	1272	1358	1631	1372
ENSG00000068724	TTC7A	2655	2223	104	207	1239	1467	1545	1601	1419	1235
ENSG00000068745	IP6K2	1088	1162	11	192	796	1002	1052	1033	1115	1009
ENSG00000068781	STON1-GTF2A1L	0	0	0	0	0	0	0	0	0	0
ENSG00000068784	SRBD1	519	843	2	31	281	242	206	351	276	342
ENSG00000068796	KIF2A	1169	1286	26	205	439	323	274	627	320	486
ENSG00000068831	RASGRP2	7117	7384	262	1808	7296	7339	7818	8418	7910	8231
ENSG00000068878	PSME4	1402	1503	84	149	783	772	836	886	888	861
ENSG00000068885	IFT80	136	161	5	18	75	55	39	89	42	121
ENSG00000068903	SIRT2	1767	1671	8	179	1002	1605	1525	1556	1569	1140
ENSG00000068912	ERLEC1	477	433	26	88	369	344	260	404	250	426
ENSG00000068971	PPP2R5B	488	617	0	92	526	527	577	507	561	388
ENSG00000068976	PYGM	367	312	8	17	145	193	265	165	369	226
ENSG00000068985	PAGE1	0	0	0	0	1	0	0	0	0	0
ENSG00000069011	PITX1	0	0	0	0	0	0	0	0	1	3
ENSG00000069018	TRPC7	0	0	0	0	0	0	0	0	0	0
ENSG00000069020	MAST4	149	156	18	88	151	82	105	135	70	136
ENSG00000069122	ADGRF5	1	0	0	0	0	0	0	0	0	0
ENSG00000069188	SDK2	40	32	0	0	97	35	31	40	5	35
ENSG00000069206	ADAM7	0	0	0	0	0	0	0	0	0	0
ENSG00000069248	NUP133	557	506	7	124	527	570	300	570	449	546
ENSG00000069275	NUCKS1	1386	1222	77	359	1448	1269	906	1498	800	1402
ENSG00000069329	VPS35	2002	1894	28	156	1471	1742	1470	1609	1763	1305
ENSG00000069345	DNAJA2	1422	1451	13	238	761	823	719	947	782	935
ENSG00000069399	BCL3	3026	2567	17	86	582	1587	1532	832	1916	1270
ENSG00000069424	KCNAB2	5643	4704	172	1016	4167	5393	6463	6315	7440	6488
ENSG00000069431	ABCC9	0	0	0	0	0	0	0	0	0	0
ENSG00000069482	GAL	0	6	0	0	0	0	0	0	0	0
ENSG00000069493	CLEC2D	1300	1538	136	373	1393	1477	1055	1915	1050	1843
ENSG00000069509	FUNDC1	125	185	0	60	79	94	93	106	78	101
ENSG00000069535	MAOB	0	3	0	0	2	1	1	1	0	1
ENSG00000069667	RORA	675	683	29	126	740	944	492	1204	391	1001
ENSG00000069696	DRD4	0	1	0	0	7	1	9	3	4	5
ENSG00000069702	TGFBR3	588	450	0	83	379	479	234	541	200	363
ENSG00000069764	PLA2G10	7	11	0	0	0	0	1	0	0	2
ENSG00000069812	HES2	0	1	0	0	0	0	0	0	0	0
ENSG00000069849	ATP1B3	903	994	21	159	624	987	710	1018	594	659
ENSG00000069869	NEDD4	83	105	10	7	46	25	26	60	24	42
ENSG00000069943	PIGB	825	770	15	98	377	520	424	403	589	464
ENSG00000069956	MAPK6	491	471	8	56	169	108	104	231	109	198
ENSG00000069966	GNB5	404	490	47	117	281	288	243	294	216	332
ENSG00000069974	RAB27A	3295	2899	74	226	1187	1482	1457	1682	2206	1733
ENSG00000069998	HDHD5	615	528	13	100	600	774	514	778	545	732
ENSG00000070010	UFD1	1483	1404	42	213	626	809	879	862	876	857
ENSG00000070018	LRP6	38	34	5	0	37	10	15	22	19	34
ENSG00000070019	GUCY2C	186	141	0	0	16	32	38	14	63	29
ENSG00000070031	SCT	2	3	0	0	4	16	9	10	5	8
ENSG00000070047	PHRF1	866	835	47	139	954	682	960	1024	858	963
ENSG00000070061	ELP1	829	757	64	180	571	552	479	759	495	693
ENSG00000070081	NUCB2	665	675	23	91	345	298	233	401	185	391
ENSG00000070087	PFN2	44	37	8	14	60	34	27	49	29	45
ENSG00000070159	PTPN3	4	1	0	0	2	0	2	18	4	3
ENSG00000070182	SPTB	539	558	32	48	505	479	792	328	717	234
ENSG00000070190	DAPP1	2380	3175	99	284	934	771	694	1195	1155	1399
ENSG00000070193	FGF10	0	0	0	0	0	0	0	0	0	0
ENSG00000070214	SLC44A1	798	745	22	51	284	315	252	424	355	306
ENSG00000070269	TMEM260	537	497	11	52	295	250	202	357	319	381
ENSG00000070366	SMG6	738	626	14	107	612	635	630	739	592	571
ENSG00000070367	EXOC5	534	434	12	56	511	320	243	545	334	516
ENSG00000070371	CLTCL1	166	159	16	0	94	149	160	135	151	79
ENSG00000070388	FGF22	3	3	0	0	2	2	4	5	6	7
ENSG00000070404	FSTL3	100	86	0	16	93	88	84	82	94	58
ENSG00000070413	DGCR2	2333	2556	43	258	2335	2432	3485	2603	4099	2392
ENSG00000070423	AC004156.1	570	615	21	177	627	711	685	650	466	686
ENSG00000070444	MNT	1304	1040	12	76	604	694	936	754	1086	779
ENSG00000070476	ZXDC	1302	1410	29	161	903	795	1037	983	1167	992
ENSG00000070495	JMJD6	3358	3738	28	103	385	599	501	488	541	532
ENSG00000070501	POLB	641	851	18	55	288	395	360	402	527	475
ENSG00000070526	ST6GALNAC1	36	63	4	16	33	46	20	76	36	49
ENSG00000070540	WIPI1	872	596	27	50	663	621	752	656	918	630
ENSG00000070601	FRMPD1	0	0	0	0	0	0	0	2	0	0
ENSG00000070610	GBA2	2518	2354	30	175	1192	1615	2183	1649	1837	1494
ENSG00000070614	NDST1	1264	1284	30	83	1161	1186	2204	859	3590	646
ENSG00000070669	ASNS	4	7	0	1	17	10	3	15	5	12
ENSG00000070718	AP3M2	289	354	4	95	242	271	192	312	227	320
ENSG00000070729	CNGB1	11	5	0	0	0	1	1	0	2	3
ENSG00000070731	ST6GALNAC2	316	220	7	0	106	123	271	139	329	157
ENSG00000070748	CHAT	0	0	0	0	0	0	0	0	0	0
ENSG00000070756	PABPC1	39152	35699	959	3593	21651	19609	15638	23411	16888	18326
ENSG00000070759	TESK2	451	461	18	44	244	223	231	215	331	254
ENSG00000070761	CFAP20	253	243	14	87	301	301	252	316	243	259
ENSG00000070770	CSNK2A2	1047	1085	28	187	639	723	617	742	531	691
ENSG00000070778	AL162171.1	8	1	0	0	0	0	0	1	0	3
ENSG00000070785	EIF2B3	188	213	19	42	137	142	130	189	98	135
ENSG00000070808	CAMK2A	0	1	0	0	0	0	0	0	0	0
ENSG00000070814	TCOF1	1169	1154	43	237	700	763	841	983	646	699
ENSG00000070831	CDC42	11717	12430	301	1248	5053	4913	4012	4562	5355	4090
ENSG00000070882	OSBPL3	730	589	11	162	311	397	316	620	287	475
ENSG00000070886	EPHA8	0	0	0	0	0	0	0	1	0	0
ENSG00000070915	SLC12A3	5	8	0	0	20	22	15	17	13	14
ENSG00000070950	RAD18	184	262	0	40	178	151	109	141	101	152
ENSG00000070961	ATP2B1	2216	1861	16	179	893	1009	801	1063	1065	1140
ENSG00000070985	TRPM5	5	1	0	0	3	3	4	3	3	3
ENSG00000071051	NCK2	1363	1571	84	427	852	663	856	708	732	816
ENSG00000071054	MAP4K4	8017	9294	150	455	1776	2109	2627	2147	4673	2770
ENSG00000071073	MGAT4A	1351	1491	55	224	1243	1112	620	1375	774	1357
ENSG00000071082	RPL31	16211	16510	863	6989	3176	1015	905	1765	779	1979
ENSG00000071127	WDR1	9261	9700	337	1126	6531	8133	8393	7598	9077	6173
ENSG00000071189	SNX13	919	956	0	42	389	264	227	380	419	461
ENSG00000071203	MS4A12	0	0	0	0	0	0	0	0	0	0
ENSG00000071205	ARHGAP10	251	261	0	29	77	102	91	90	65	106
ENSG00000071242	RPS6KA2	130	131	9	18	235	132	183	112	127	89
ENSG00000071243	ING3	562	629	21	66	223	262	212	306	290	306
ENSG00000071246	VASH1	461	621	17	76	321	460	372	424	552	270
ENSG00000071282	LMCD1	12	7	0	10	6	7	6	9	6	3
ENSG00000071462	BUD23	731	780	27	193	756	904	684	933	647	788
ENSG00000071537	SEL1L	1572	1399	5	88	893	776	735	984	1264	1058
ENSG00000071539	TRIP13	18	8	0	0	6	7	9	24	6	11
ENSG00000071553	ATP6AP1	3461	3340	66	291	1761	2660	2705	2043	3307	1768
ENSG00000071564	TCF3	860	888	27	129	1230	960	1084	1200	772	1275
ENSG00000071575	TRIB2	1140	1460	49	693	1223	1034	598	1537	717	1220
ENSG00000071626	DAZAP1	1783	1736	57	418	1592	1642	1486	2164	1295	2075
ENSG00000071655	MBD3	357	382	0	131	892	1007	984	960	705	901
ENSG00000071677	PRLH	0	0	0	0	0	0	0	0	0	0
ENSG00000071794	HLTF	133	153	0	43	208	145	91	221	84	208
ENSG00000071859	FAM50A	1237	1046	75	322	524	878	894	700	822	664
ENSG00000071889	FAM3A	383	342	9	91	534	555	572	551	420	558
ENSG00000071894	CPSF1	1745	1520	48	392	1671	1166	2140	2628	2201	2488
ENSG00000071909	MYO3B	15	10	0	0	4	0	3	1	0	10
ENSG00000071967	CYBRD1	716	535	0	4	440	705	596	356	568	197
ENSG00000071991	CDH19	0	0	0	0	0	0	0	0	0	0
ENSG00000071994	PDCD2	982	1022	35	171	564	619	383	652	440	631
ENSG00000072041	SLC6A15	0	0	0	0	0	0	0	0	0	0
ENSG00000072042	RDH11	729	763	9	274	454	550	339	480	339	382
ENSG00000072062	PRKACA	4221	4364	39	340	1362	2351	2458	1708	3141	1458
ENSG00000072071	ADGRL1	436	373	48	45	475	616	455	736	454	473
ENSG00000072080	SPP2	0	0	0	0	0	0	0	0	0	0
ENSG00000072110	ACTN1	8053	8226	277	668	4107	4594	6302	3599	9147	4365
ENSG00000072121	ZFYVE26	633	682	14	70	521	526	566	786	602	610
ENSG00000072133	RPS6KA6	4	4	0	6	1	1	0	0	1	0
ENSG00000072134	EPN2	159	163	2	14	257	114	223	164	213	125
ENSG00000072135	PTPN18	3874	3984	196	1115	2679	4267	3674	3607	3003	2385
ENSG00000072163	LIMS2	47	58	0	25	150	69	77	163	101	139
ENSG00000072182	ASIC4	0	0	0	0	0	0	0	1	0	3
ENSG00000072195	SPEG	51	34	15	15	106	63	26	75	47	116
ENSG00000072201	LNX1	264	272	9	71	114	122	123	148	112	135
ENSG00000072210	ALDH3A2	720	562	44	257	484	552	377	565	365	369
ENSG00000072274	TFRC	959	913	25	130	324	333	260	513	235	530
ENSG00000072310	SREBF1	1167	955	8	100	961	1028	1193	1153	1335	1227
ENSG00000072315	TRPC5	0	0	0	0	0	0	0	0	0	1
ENSG00000072364	AFF4	1410	1359	0	85	646	489	362	677	533	602
ENSG00000072401	UBE2D1	966	574	1	51	824	989	760	1043	1625	999
ENSG00000072415	MPP5	202	141	0	0	136	92	82	153	86	141
ENSG00000072422	RHOBTB1	61	79	0	41	32	25	21	11	26	14
ENSG00000072501	SMC1A	1664	2080	38	148	1063	988	805	1654	1121	1248
ENSG00000072506	HSD17B10	595	704	29	141	542	886	715	855	498	679
ENSG00000072518	MARK2	3249	3593	25	226	1617	1875	2733	2231	3201	1679
ENSG00000072571	HMMR	17	14	0	0	12	4	9	21	7	16
ENSG00000072609	CHFR	1772	1581	47	190	1180	1098	1379	1485	1429	1420
ENSG00000072657	TRHDE	0	0	0	1	0	0	1	0	0	0
ENSG00000072682	P4HA2	90	81	181	648	6	7	14	9	15	20
ENSG00000072694	FCGR2B	670	1768	19	32	350	348	395	345	674	912
ENSG00000072736	NFATC3	2021	2042	33	202	1249	1451	1092	1406	1132	1059
ENSG00000072756	TRNT1	349	332	23	129	354	330	206	417	265	438
ENSG00000072778	ACADVL	5860	6204	70	944	3040	3470	3634	3270	3615	3443
ENSG00000072786	STK10	10552	10720	192	1073	6283	7780	8659	7645	9575	6515
ENSG00000072803	FBXW11	824	837	2	51	499	481	359	498	407	465
ENSG00000072818	ACAP1	6291	5829	235	1667	4789	5829	6931	5869	7042	6393
ENSG00000072832	CRMP1	18	11	10	15	4	2	6	5	8	8
ENSG00000072840	EVC	96	45	0	0	7	7	6	19	5	9
ENSG00000072849	DERL2	769	723	22	107	490	760	558	654	661	638
ENSG00000072858	SIDT1	501	452	21	71	480	451	351	558	293	380
ENSG00000072864	NDE1	2330	2472	30	108	1091	1013	1346	961	1930	691
ENSG00000072952	MRVI1	1748	1697	0	94	384	746	1177	779	2561	693
ENSG00000072954	TMEM38A	82	50	0	0	81	60	82	87	133	65
ENSG00000072958	AP1M1	1690	1671	50	233	1512	1966	2015	1705	1781	1474
ENSG00000073008	PVR	273	259	0	20	123	166	183	130	170	69
ENSG00000073050	XRCC1	647	579	35	79	522	636	609	551	637	429
ENSG00000073060	SCARB1	314	242	0	10	193	275	213	232	179	143
ENSG00000073067	CYP2W1	0	0	0	0	1	2	0	0	1	1
ENSG00000073111	MCM2	161	136	17	7	171	158	146	265	142	226
ENSG00000073146	MOV10L1	1	1	0	0	1	0	0	2	0	1
ENSG00000073150	PANX2	399	463	19	24	177	238	624	174	658	221
ENSG00000073169	SELENOO	636	607	3	185	820	1037	1322	880	1034	857
ENSG00000073282	TP63	9	15	0	0	4	3	2	12	5	8
ENSG00000073331	ALPK1	2930	2713	0	83	795	1248	1392	1285	2284	1822
ENSG00000073350	LLGL2	642	543	10	147	728	1104	795	1172	564	874
ENSG00000073417	PDE8A	322	257	22	51	239	303	178	267	229	229
ENSG00000073464	CLCN4	147	250	17	13	93	68	112	68	272	68
ENSG00000073536	NLE1	244	241	14	64	315	240	174	301	164	391
ENSG00000073578	SDHA	149	149	6	49	46	55	47	69	35	62
ENSG00000073584	SMARCE1	61	59	0	24	72	79	54	106	54	69
ENSG00000073598	FNDC8	20	17	0	0	49	41	23	35	28	57
ENSG00000073605	GSDMB	492	358	16	385	692	639	443	1062	787	1044
ENSG00000073614	KDM5A	3675	4093	67	261	1105	1012	1110	1269	1478	1200
ENSG00000073670	ADAM11	19	11	0	0	9	5	16	21	10	7
ENSG00000073711	PPP2R3A	21	16	0	6	15	19	11	27	16	26
ENSG00000073712	FERMT2	0	5	0	17	1	5	2	5	2	1
ENSG00000073734	ABCB11	2	8	0	0	0	0	0	1	1	0
ENSG00000073737	DHRS9	457	1241	0	29	472	184	543	624	519	557
ENSG00000073754	CD5L	0	0	0	0	0	0	0	1	0	0
ENSG00000073756	PTGS2	12500	13653	39	60	183	178	251	281	453	206
ENSG00000073792	IGF2BP2	215	189	40	54	254	199	137	100	108	100
ENSG00000073803	MAP3K13	299	307	2	16	177	130	98	130	115	136
ENSG00000073849	ST6GAL1	2189	2605	124	424	3255	2322	2191	3610	2054	3200
ENSG00000073861	TBX21	879	565	32	261	931	2218	1089	1797	616	1128
ENSG00000073905	VDAC1P1	2	0	0	0	2	1	0	3	0	1
ENSG00000073910	FRY	2386	2621	11	51	745	643	910	711	1421	704
ENSG00000073921	PICALM	10838	11316	110	412	3030	4790	4227	3745	7034	4561
ENSG00000073969	NSF	591	627	0	49	439	601	467	576	514	447
ENSG00000074047	GLI2	0	1	0	0	0	0	0	0	0	0
ENSG00000074054	CLASP1	1127	1038	27	110	514	507	449	584	500	522
ENSG00000074071	MRPS34	454	392	14	199	493	706	614	598	425	518
ENSG00000074181	NOTCH3	8	1	0	6	5	8	10	3	6	4
ENSG00000074201	CLNS1A	1171	1082	28	183	652	582	390	657	401	657
ENSG00000074211	PPP2R2C	0	0	0	0	1	0	0	0	0	0
ENSG00000074219	TEAD2	72	83	14	6	75	47	51	59	60	50
ENSG00000074266	EED	278	272	10	67	208	259	202	301	161	331
ENSG00000074276	CDHR2	15	25	0	1	18	18	22	38	12	24
ENSG00000074317	SNCB	0	0	0	0	0	0	0	1	0	0
ENSG00000074319	TSG101	1204	1171	26	123	735	1008	1027	864	1075	728
ENSG00000074356	NCBP3	1559	1331	31	82	651	689	680	748	703	726
ENSG00000074370	ATP2A3	6181	6479	238	1223	7580	6988	9971	7809	9583	7120
ENSG00000074410	CA12	6	5	0	3	0	0	3	2	4	5
ENSG00000074416	MGLL	165	192	76	166	220	382	203	177	157	94
ENSG00000074527	NTN4	5	12	3	9	7	11	9	8	8	2
ENSG00000074582	BCS1L	431	388	12	116	301	372	321	337	270	354
ENSG00000074590	NUAK1	30	24	0	9	6	4	7	12	3	5
ENSG00000074603	DPP8	1227	1220	23	114	591	574	512	745	564	705
ENSG00000074621	SLC24A1	185	134	9	41	146	113	148	165	116	165
ENSG00000074657	ZNF532	281	270	0	17	151	60	53	91	54	84
ENSG00000074660	SCARF1	853	1043	5	13	464	882	892	826	1461	1178
ENSG00000074695	LMAN1	506	426	47	78	471	424	319	593	323	623
ENSG00000074696	HACD3	134	198	20	42	285	292	190	356	167	357
ENSG00000074706	IPCEF1	1459	1787	22	147	947	716	628	905	839	974
ENSG00000074755	ZZEF1	2997	2538	70	235	1581	1286	1676	1899	2006	1554
ENSG00000074771	NOX3	0	0	0	10	0	0	0	0	0	0
ENSG00000074800	ENO1	11648	11274	415	1585	8662	13802	11459	11437	10312	8768
ENSG00000074803	SLC12A1	43	37	0	0	11	239	26	9	20	6
ENSG00000074842	MYDGF	688	630	37	126	411	798	470	587	369	568
ENSG00000074855	ANO8	303	272	8	48	183	146	201	254	192	268
ENSG00000074935	TUBE1	185	134	18	69	136	99	43	136	63	142
ENSG00000074964	ARHGEF10L	684	551	20	4	402	519	470	500	430	376
ENSG00000074966	TXK	360	360	28	108	683	639	208	709	274	624
ENSG00000075035	WSCD2	2	5	0	0	2	1	8	6	0	3
ENSG00000075043	KCNQ2	3	3	5	5	0	2	0	2	0	1
ENSG00000075073	TACR2	3	7	0	0	1	2	3	2	3	4
ENSG00000075089	ACTR6	223	214	10	65	173	96	87	166	88	221
ENSG00000075131	TIPIN	45	37	8	22	24	25	9	25	10	42
ENSG00000075142	SRI	886	1018	44	227	725	798	706	818	568	686
ENSG00000075151	EIF4G3	2194	2410	42	84	473	508	426	635	671	573
ENSG00000075188	NUP37	193	237	22	28	124	135	111	163	94	142
ENSG00000075213	SEMA3A	2	4	0	0	3	3	0	7	3	1
ENSG00000075218	GTSE1	15	21	0	6	8	7	16	31	11	22
ENSG00000075223	SEMA3C	172	138	0	0	57	27	25	50	46	30
ENSG00000075234	TTC38	805	583	37	135	1053	2519	1064	1607	866	771
ENSG00000075239	ACAT1	312	352	0	71	241	212	175	227	124	255
ENSG00000075240	GRAMD4	728	762	30	25	476	462	428	612	515	382
ENSG00000075275	CELSR1	76	62	0	29	106	37	78	84	55	81
ENSG00000075290	WNT8B	0	0	0	0	3	2	1	2	3	4
ENSG00000075292	ZNF638	2381	2389	74	306	884	736	743	1107	1047	992
ENSG00000075303	SLC25A40	403	369	3	22	390	311	215	456	365	363
ENSG00000075336	TIMM21	172	155	6	98	134	127	93	153	75	124
ENSG00000075340	ADD2	51	88	0	3	164	74	53	121	77	85
ENSG00000075388	FGF4	0	0	0	0	1	0	0	0	0	0
ENSG00000075391	RASAL2	23	27	0	0	15	2	7	5	8	14
ENSG00000075399	VPS9D1	1687	1695	9	183	741	850	1150	848	1315	1585
ENSG00000075407	ZNF37A	330	282	7	40	146	143	90	175	85	154
ENSG00000075413	MARK3	2480	2836	47	263	1257	1416	1228	1183	1446	1270
ENSG00000075415	SLC25A3	5876	5304	273	740	2921	4348	3357	3436	3074	3207
ENSG00000075420	FNDC3B	2207	1860	34	24	491	545	396	539	866	609
ENSG00000075426	FOSL2	7160	6074	38	250	1475	2214	2554	2367	4212	1826
ENSG00000075429	CACNG5	0	0	0	0	0	0	0	0	0	0
ENSG00000075461	CACNG4	0	0	0	0	0	2	2	1	0	5
ENSG00000075539	FRYL	1254	1207	24	142	737	637	534	891	674	789
ENSG00000075568	TMEM131	1255	1298	31	98	856	888	819	848	993	836
ENSG00000075618	FSCN1	84	70	8	4	62	80	94	40	94	51
ENSG00000075624	ACTB	124781	150878	4847	21364	100428	149686	137162	111829	143601	95729
ENSG00000075643	MOCOS	1	3	0	0	8	0	2	4	0	0
ENSG00000075651	PLD1	154	160	0	15	77	101	104	85	148	65
ENSG00000075673	ATP12A	0	0	0	0	1	1	0	0	0	0
ENSG00000075702	WDR62	35	42	0	9	52	31	44	66	27	63
ENSG00000075711	DLG1	677	682	50	97	357	353	231	441	259	397
ENSG00000075785	RAB7A	9104	10249	141	930	3165	5035	4976	4025	6290	3692
ENSG00000075790	BCAP29	338	294	9	10	227	246	202	259	163	225
ENSG00000075826	SEC31B	820	899	21	402	458	587	591	929	705	802
ENSG00000075856	SART3	759	765	14	152	852	837	764	1067	726	839
ENSG00000075884	ARHGAP15	2872	2897	47	430	1111	1111	1104	1140	1402	1421
ENSG00000075886	TUBA3D	4	7	0	0	14	0	5	8	3	5
ENSG00000075891	PAX2	0	4	0	0	4	0	0	1	0	0
ENSG00000075914	EXOSC7	226	230	13	70	179	265	184	218	145	222
ENSG00000075945	KIFAP3	216	241	0	36	285	307	186	228	140	279
ENSG00000075975	MKRN2	1065	1022	8	137	498	589	541	620	645	561
ENSG00000076003	MCM6	285	329	33	121	303	343	309	586	304	407
ENSG00000076043	REXO2	176	257	17	76	133	182	111	166	82	175
ENSG00000076053	RBM7	693	719	12	35	335	315	263	341	296	340
ENSG00000076067	RBMS2	642	417	0	41	238	346	302	276	392	279
ENSG00000076108	BAZ2A	6610	6371	88	433	2465	2083	2755	3318	3802	2859
ENSG00000076201	PTPN23	883	855	43	119	756	741	952	872	915	733
ENSG00000076242	MLH1	620	583	3	94	328	393	285	360	273	393
ENSG00000076248	UNG	215	216	9	98	188	264	169	269	137	200
ENSG00000076258	FMO4	50	34	0	0	35	55	20	38	46	46
ENSG00000076321	KLHL20	251	265	6	40	233	145	120	234	155	219
ENSG00000076344	RGS11	3	1	0	0	4	2	7	4	5	1
ENSG00000076351	SLC46A1	532	475	24	123	389	466	405	601	346	438
ENSG00000076356	PLXNA2	165	213	0	5	56	46	110	60	227	46
ENSG00000076382	SPAG5	75	92	4	13	52	40	52	66	51	54
ENSG00000076513	ANKRD13A	6208	6490	75	329	2307	1851	3486	2994	4391	2777
ENSG00000076554	TPD52	114	86	0	19	227	226	149	133	148	230
ENSG00000076555	ACACB	269	330	18	28	342	131	244	254	184	221
ENSG00000076604	TRAF4	617	531	30	21	306	309	247	253	164	256
ENSG00000076641	PAG1	1590	1833	14	265	1130	929	496	1501	757	1366
ENSG00000076650	GPATCH1	312	317	0	69	200	179	217	232	187	191
ENSG00000076662	ICAM3	17106	17057	436	1293	9712	13640	22594	10403	27390	11733
ENSG00000076685	NT5C2	5824	5974	140	255	1325	1332	1855	1675	2710	1541
ENSG00000076706	AP002956.1	32	15	0	3	8	7	6	6	22	10
ENSG00000076716	GPC4	12	19	21	0	2	17	3	4	4	4
ENSG00000076770	MBNL3	559	465	0	31	1149	827	623	708	446	590
ENSG00000076826	CAMSAP3	5	4	0	0	5	4	3	4	5	10
ENSG00000076864	RAP1GAP	35	16	0	1	243	10	31	6	27	19
ENSG00000076924	XAB2	1084	1087	55	234	1111	1348	1441	1241	1239	1234
ENSG00000076928	ARHGEF1	14788	13183	364	2994	11350	11997	15701	13826	14993	15487
ENSG00000076944	STXBP2	3702	3701	55	302	1898	3063	3726	2109	4400	2169
ENSG00000076984	MAP2K7	1229	1102	21	128	944	884	1271	1069	1226	999
ENSG00000077009	NMRK2	0	4	1	3	0	0	0	0	0	0
ENSG00000077044	DGKD	3353	2745	70	390	3357	2273	2670	2851	3078	2879
ENSG00000077063	CTTNBP2	53	26	10	0	0	1	2	2	1	0
ENSG00000077080	ACTL6B	0	0	0	0	0	1	0	1	0	0
ENSG00000077092	RARB	2	3	0	7	8	4	1	9	7	0
ENSG00000077097	TOP2B	2752	2752	55	368	2048	1768	1601	2036	1439	1788
ENSG00000077147	TM9SF3	1429	1275	17	189	1245	1212	910	1347	1105	1439
ENSG00000077150	NFKB2	5000	4569	67	255	1468	2124	2623	1953	3007	2712
ENSG00000077152	UBE2T	32	36	0	31	29	25	9	33	7	33
ENSG00000077157	PPP1R12B	1508	1721	20	60	703	712	1182	798	2932	992
ENSG00000077232	DNAJC10	1659	1358	19	143	814	635	485	829	479	894
ENSG00000077235	GTF3C1	1177	1057	26	245	1055	1262	1251	1413	1138	1033
ENSG00000077238	IL4R	8657	7223	124	452	2828	3103	3005	2910	5012	4491
ENSG00000077254	USP33	1360	1365	34	124	744	627	577	933	743	924
ENSG00000077264	PAK3	3	6	0	7	3	0	1	3	2	2
ENSG00000077274	CAPN6	0	0	0	0	1	0	0	0	0	0
ENSG00000077279	DCX	0	0	0	0	0	0	0	0	0	0
ENSG00000077312	SNRPA	963	1077	58	284	733	978	837	951	588	840
ENSG00000077327	SPAG6	1	6	0	0	0	2	1	2	2	4
ENSG00000077348	EXOSC5	156	162	15	33	298	327	260	317	214	286
ENSG00000077380	DYNC1I2	849	925	77	90	576	488	367	592	341	418
ENSG00000077420	APBB1IP	6066	6685	65	537	2397	3275	4026	2563	5392	3234
ENSG00000077454	LRCH4	1999	1817	17	160	947	590	1585	1074	1932	1029
ENSG00000077458	FAM76B	793	577	0	78	300	229	135	353	209	346
ENSG00000077463	AC016586.1	377	411	12	96	372	383	549	373	459	356
ENSG00000077498	TYR	0	0	0	0	0	0	0	0	0	0
ENSG00000077514	POLD3	559	436	7	9	302	332	329	352	318	312
ENSG00000077522	ACTN2	0	0	0	0	0	0	0	0	0	1
ENSG00000077549	CAPZB	8632	8624	425	1560	5031	7231	6919	5910	7101	5275
ENSG00000077585	GPR137B	181	174	7	30	161	183	118	201	175	168
ENSG00000077616	NAALAD2	6	3	0	3	19	13	6	29	11	17
ENSG00000077684	JADE1	1236	1284	11	300	791	893	671	855	707	679
ENSG00000077713	SLC25A43	113	154	0	47	96	136	72	102	59	71
ENSG00000077721	UBE2A	1190	1156	24	57	748	885	796	960	927	982
ENSG00000077782	FGFR1	183	255	15	49	117	167	180	281	164	82
ENSG00000077800	FKBP6	3	2	0	0	0	0	1	1	0	0
ENSG00000077935	SMC1B	8	4	11	0	11	8	0	7	3	7
ENSG00000077942	FBLN1	0	3	0	0	0	1	1	0	2	0
ENSG00000077943	ITGA8	0	0	0	0	0	0	1	0	0	0
ENSG00000077984	CST7	2994	1215	85	353	2037	7315	3495	3936	4003	4371
ENSG00000078018	MAP2	6	16	0	0	8	2	1	3	8	8
ENSG00000078043	PIAS2	235	205	11	4	238	237	158	285	230	257
ENSG00000078053	AMPH	25	16	0	8	9	23	12	15	14	28
ENSG00000078061	ARAF	1889	1976	53	321	1729	2278	2413	1947	2098	1715
ENSG00000078070	MCCC1	385	363	9	83	266	281	203	270	169	231
ENSG00000078081	LAMP3	19	220	0	18	20	23	33	72	64	40
ENSG00000078098	FAP	1	11	0	0	0	2	1	2	3	1
ENSG00000078114	NEBL	362	360	0	3	7	2	5	0	8	5
ENSG00000078124	ACER3	435	466	15	31	313	500	292	328	319	362
ENSG00000078140	UBE2K	886	960	32	119	591	760	567	743	682	725
ENSG00000078142	PIK3C3	989	959	28	52	551	578	544	622	644	663
ENSG00000078177	N4BP2	439	424	26	49	137	96	44	189	60	125
ENSG00000078237	TIGAR	85	80	0	5	72	108	77	104	80	68
ENSG00000078246	TULP3	159	155	0	31	91	94	66	81	64	79
ENSG00000078269	SYNJ2	272	283	15	38	233	208	153	325	245	186
ENSG00000078295	ADCY2	0	0	0	0	0	0	2	0	0	0
ENSG00000078304	PPP2R5C	4770	4832	98	666	2538	2929	2421	3574	2575	2852
ENSG00000078319	PMS2P1	392	317	6	84	188	141	136	274	133	165
ENSG00000078328	RBFOX1	0	0	0	0	0	0	0	0	1	0
ENSG00000078369	GNB1	10649	10590	236	1098	4574	6073	5701	5410	6472	4561
ENSG00000078399	HOXA9	5	4	0	0	3	0	1	9	7	4
ENSG00000078401	EDN1	95	88	0	0	21	25	5	22	15	27
ENSG00000078403	MLLT10	1090	1085	12	84	326	255	216	370	205	345
ENSG00000078487	ZCWPW1	369	304	25	12	179	136	189	160	266	168
ENSG00000078549	ADCYAP1R1	0	0	0	0	0	0	0	0	1	0
ENSG00000078579	FGF20	1	0	0	0	0	0	0	0	0	0
ENSG00000078589	P2RY10	423	714	28	132	686	418	610	568	476	639
ENSG00000078596	ITM2A	310	463	8	173	865	562	333	887	423	996
ENSG00000078618	NRDC	7449	7043	186	513	2093	2721	3266	2499	4499	3060
ENSG00000078668	VDAC3	1618	1656	60	432	882	1161	968	967	843	918
ENSG00000078674	PCM1	3015	2801	84	325	1128	862	808	1173	889	1331
ENSG00000078687	TNRC6C	738	842	48	416	947	834	682	971	732	943
ENSG00000078699	CBFA2T2	791	712	14	124	503	341	407	640	376	564
ENSG00000078725	BRINP1	0	0	0	0	0	0	0	0	0	0
ENSG00000078747	ITCH	2213	2067	82	178	1025	1231	907	1333	1311	1241
ENSG00000078795	PKD2L2	215	202	0	23	153	106	107	161	120	131
ENSG00000078804	TP53INP2	1509	1389	12	55	199	181	471	118	767	122
ENSG00000078808	SDF4	2262	2184	127	258	1783	1855	2208	2102	2152	1865
ENSG00000078814	MYH7B	103	77	0	2	51	69	91	81	102	102
ENSG00000078898	BPIFB2	0	0	0	0	0	0	0	0	0	0
ENSG00000078900	TP73	19	18	0	0	22	28	23	20	11	13
ENSG00000078902	TOLLIP	974	1042	89	140	1167	1270	1299	1050	1462	1024
ENSG00000078967	UBE2D4	185	189	0	51	141	215	174	149	131	133
ENSG00000079101	CLUL1	3	0	0	0	0	0	1	1	0	1
ENSG00000079102	RUNX1T1	0	0	0	0	0	0	0	0	0	0
ENSG00000079112	CDH17	0	0	0	0	1	2	1	0	1	0
ENSG00000079134	THOC1	369	403	0	127	328	347	278	404	299	389
ENSG00000079150	FKBP7	5	11	0	0	7	12	2	5	6	4
ENSG00000079156	OSBPL6	5	20	0	0	6	4	14	0	14	4
ENSG00000079215	SLC1A3	8	20	0	0	4	6	8	17	6	8
ENSG00000079246	XRCC5	6854	7244	241	846	3615	3970	3962	4210	4443	4132
ENSG00000079257	LXN	199	209	0	54	69	69	90	72	91	69
ENSG00000079263	SP140	995	1601	48	193	542	503	531	774	669	643
ENSG00000079277	MKNK1	2531	1811	46	169	966	1610	1640	1560	2720	1338
ENSG00000079308	TNS1	111	91	24	124	811	447	408	365	312	214
ENSG00000079313	REXO1	870	882	14	84	642	515	774	717	562	697
ENSG00000079332	SAR1A	1361	1576	53	285	1291	1553	1264	1499	1498	1445
ENSG00000079335	CDC14A	592	738	15	95	358	219	168	407	179	392
ENSG00000079337	RAPGEF3	99	129	0	18	84	36	77	68	67	51
ENSG00000079385	CEACAM1	655	1681	0	27	213	239	428	416	643	362
ENSG00000079387	SENP1	387	346	12	13	271	194	217	324	205	276
ENSG00000079393	DUSP13	11	5	0	0	2	15	8	12	33	3
ENSG00000079432	CIC	3092	2250	53	329	2030	1629	2531	1895	2344	1951
ENSG00000079435	LIPE	102	107	0	59	144	93	139	146	124	131
ENSG00000079459	FDFT1	1851	2155	56	188	1445	1759	1553	1571	1437	1405
ENSG00000079462	PAFAH1B3	132	123	5	69	162	208	183	221	131	178
ENSG00000079482	OPHN1	17	36	5	5	13	20	10	25	9	2
ENSG00000079557	AFM	0	0	0	0	0	1	0	0	0	0
ENSG00000079616	KIF22	894	789	46	321	720	937	852	1061	668	897
ENSG00000079689	SCGN	0	0	0	0	0	0	0	0	0	0
ENSG00000079691	CARMIL1	35	59	0	2	55	44	43	56	39	74
ENSG00000079739	PGM1	693	822	12	116	380	592	621	420	698	398
ENSG00000079785	DDX1	788	838	63	224	579	538	489	677	426	691
ENSG00000079805	DNM2	6950	6429	133	658	4234	4359	6633	5630	7025	4992
ENSG00000079819	EPB41L2	381	447	10	53	119	132	109	145	151	127
ENSG00000079841	RIMS1	0	0	0	0	0	0	0	0	0	0
ENSG00000079931	MOXD1	5	8	0	0	16	9	5	8	5	17
ENSG00000079950	STX7	2230	2102	39	180	1141	1102	1133	1333	1702	1501
ENSG00000079974	RABL2B	488	503	33	55	380	334	275	354	276	368
ENSG00000079999	KEAP1	414	392	29	135	509	653	605	745	546	500
ENSG00000080007	DDX43	43	30	0	0	14	39	10	13	13	12
ENSG00000080031	AC010327.1	3	5	0	0	0	1	1	0	2	2
ENSG00000080166	DCT	4	3	0	0	2	4	4	8	1	8
ENSG00000080189	SLC35C2	1344	1287	56	280	1324	1584	1604	1531	1466	1447
ENSG00000080200	CRYBG3	352	372	11	65	213	194	121	211	158	225
ENSG00000080224	EPHA6	0	0	0	0	0	0	0	0	0	0
ENSG00000080293	SCTR	0	0	0	0	0	0	0	0	0	1
ENSG00000080298	RFX3	283	217	9	49	196	135	89	202	152	196
ENSG00000080345	RIF1	676	682	10	43	509	392	254	569	411	581
ENSG00000080371	RAB21	1006	993	22	141	627	749	484	624	780	759
ENSG00000080493	SLC4A4	81	31	0	0	18	32	11	32	14	21
ENSG00000080503	SMARCA2	3212	3094	93	304	1637	1224	1258	1838	1462	1572
ENSG00000080511	RDH8	0	0	0	0	0	0	0	0	1	0
ENSG00000080546	SESN1	457	385	31	85	709	496	291	564	325	618
ENSG00000080561	MID2	87	79	0	3	35	15	22	18	12	18
ENSG00000080572	PIH1D3	0	0	0	0	0	0	0	0	0	0
ENSG00000080573	COL5A3	45	14	5	89	428	11	71	445	218	73
ENSG00000080603	SRCAP	87	100	0	0	66	56	59	72	73	62
ENSG00000080608	PUM3	304	349	0	36	153	179	130	214	108	235
ENSG00000080618	CPB2	0	0	0	0	1	0	0	0	0	1
ENSG00000080644	CHRNA3	0	4	0	0	0	0	0	1	0	0
ENSG00000080709	KCNN2	0	0	0	0	0	0	0	0	0	0
ENSG00000080802	CNOT4	413	459	12	115	283	318	214	338	237	256
ENSG00000080815	PSEN1	2800	2824	70	172	1489	1877	1927	1660	2469	1466
ENSG00000080819	CPOX	201	167	13	50	219	179	100	230	120	244
ENSG00000080822	CLDND1	813	703	1	363	484	699	507	761	433	691
ENSG00000080823	MOK	83	31	0	0	25	15	26	16	34	26
ENSG00000080824	HSP90AA1	13763	15241	660	1591	4212	3842	3316	5182	3339	5488
ENSG00000080839	RBL1	196	190	0	70	181	108	95	216	80	172
ENSG00000080845	DLGAP4	1254	1177	36	181	834	813	967	943	1117	757
ENSG00000080854	IGSF9B	29	57	0	18	25	24	16	59	21	34
ENSG00000080910	CFHR2	0	0	0	0	0	1	0	0	0	0
ENSG00000080947	CROCCP3	121	123	1	35	131	143	136	149	111	147
ENSG00000080986	NDC80	84	100	0	16	41	38	35	75	62	87
ENSG00000081014	AP4E1	378	340	6	5	192	152	134	202	124	195
ENSG00000081019	RSBN1	1030	1037	36	43	613	441	299	547	436	639
ENSG00000081026	MAGI3	32	38	0	10	34	18	21	26	31	35
ENSG00000081041	CXCL2	90	71	0	0	2	10	1	1	4	3
ENSG00000081051	AFP	0	0	0	0	0	0	0	0	0	0
ENSG00000081052	COL4A4	43	65	0	13	40	20	12	34	13	35
ENSG00000081059	TCF7	3784	5044	207	2099	6757	5220	3470	7390	3916	5630
ENSG00000081087	OSTM1	775	772	21	46	627	546	429	617	708	652
ENSG00000081138	CDH7	0	0	0	0	0	0	0	0	0	0
ENSG00000081148	IMPG2	30	14	0	0	6	7	6	4	5	6
ENSG00000081154	PCNP	1725	1593	44	232	987	699	501	1053	640	1019
ENSG00000081177	EXD2	135	139	13	25	125	93	89	116	92	119
ENSG00000081181	ARG2	542	551	46	85	330	394	257	332	271	305
ENSG00000081189	MEF2C	1125	1401	11	48	573	474	456	474	575	548
ENSG00000081237	PTPRC	43741	41470	479	1741	14483	12242	12899	17815	16532	17415
ENSG00000081248	CACNA1S	0	0	0	0	0	0	0	2	3	0
ENSG00000081277	PKP1	0	0	0	0	0	0	0	0	0	0
ENSG00000081307	UBA5	408	375	11	92	256	274	169	318	170	245
ENSG00000081320	STK17B	8681	9268	123	490	3769	3034	2595	3464	4827	3814
ENSG00000081377	CDC14B	234	294	52	187	230	191	159	141	122	203
ENSG00000081386	ZNF510	253	235	8	64	148	90	101	159	98	156
ENSG00000081479	LRP2	3	2	2	0	0	0	0	0	0	0
ENSG00000081665	ZNF506	301	324	11	83	468	546	532	542	445	460
ENSG00000081692	JMJD4	211	197	9	58	300	334	276	341	225	284
ENSG00000081721	DUSP12	286	297	0	59	164	200	114	185	124	182
ENSG00000081760	AACS	227	202	17	47	207	208	193	198	169	154
ENSG00000081791	DELE1	1758	1510	75	191	1063	1389	1254	1518	1318	1270
ENSG00000081800	SLC13A1	0	0	0	0	0	0	0	0	0	0
ENSG00000081803	CADPS2	0	1	0	0	0	0	0	0	0	0
ENSG00000081818	PCDHB4	0	0	0	0	0	1	0	0	0	0
ENSG00000081842	PCDHA6	0	0	0	0	0	0	0	0	0	0
ENSG00000081853	PCDHGA2	0	0	0	0	0	0	1	0	0	0
ENSG00000081870	HSPB11	309	274	28	69	124	125	99	165	86	154
ENSG00000081913	PHLPP1	202	261	54	17	111	137	197	143	294	141
ENSG00000081923	ATP8B1	38	47	2	0	33	36	32	44	25	43
ENSG00000081985	IL12RB2	59	58	0	26	73	148	78	107	59	31
ENSG00000082014	SMARCD3	1461	1089	37	52	470	835	870	780	911	700
ENSG00000082068	WDR70	520	440	20	46	280	280	260	331	208	296
ENSG00000082074	FYB1	15838	18093	613	1623	5509	4848	4126	7283	7328	7521
ENSG00000082126	MPP4	0	0	0	0	1	1	2	0	0	0
ENSG00000082146	STRADB	335	417	0	53	2714	1260	970	638	567	728
ENSG00000082153	BZW1	2697	2674	55	307	1228	776	682	1075	708	956
ENSG00000082175	PGR	0	0	0	0	0	0	0	0	0	0
ENSG00000082196	C1QTNF3	22	18	0	5	26	32	19	20	8	31
ENSG00000082212	ME2	1732	1869	27	70	754	930	803	1058	1185	1013
ENSG00000082213	C5orf22	269	305	35	39	198	225	149	244	201	226
ENSG00000082258	CCNT2	1377	1268	12	133	674	531	299	884	541	919
ENSG00000082269	FAM135A	198	154	0	10	90	60	31	97	40	76
ENSG00000082293	COL19A1	95	75	0	0	31	7	10	17	15	36
ENSG00000082397	EPB41L3	709	954	7	31	273	418	190	386	356	298
ENSG00000082438	COBLL1	137	128	0	4	104	37	52	60	41	73
ENSG00000082458	DLG3	170	162	14	78	154	148	154	201	78	161
ENSG00000082482	KCNK2	0	0	0	0	0	0	0	0	0	0
ENSG00000082497	SERTAD4	0	0	0	0	0	0	0	0	0	0
ENSG00000082512	TRAF5	1061	1017	22	223	860	707	495	1092	532	851
ENSG00000082515	MRPL22	234	288	19	62	110	89	77	95	57	98
ENSG00000082516	GEMIN5	183	183	5	47	246	199	172	289	208	230
ENSG00000082556	OPRK1	0	0	0	0	0	0	0	0	0	0
ENSG00000082641	NFE2L1	1795	1849	40	156	997	1129	1161	1303	1355	1058
ENSG00000082684	SEMA5B	1	0	9	0	0	1	0	0	0	0
ENSG00000082701	GSK3B	1959	2116	23	62	567	812	762	776	1086	781
ENSG00000082781	ITGB5	154	189	94	307	86	242	193	77	165	61
ENSG00000082805	ERC1	538	467	1	25	190	182	134	199	180	193
ENSG00000082898	XPO1	2355	2383	75	242	1443	1294	941	1782	1338	1758
ENSG00000082929	LINC01587	0	0	0	0	0	0	0	0	0	0
ENSG00000082996	RNF13	2903	3674	26	97	1184	1122	1144	1245	2116	1462
ENSG00000083067	TRPM3	1	0	0	0	0	0	0	0	0	0
ENSG00000083093	PALB2	185	195	6	20	131	128	82	150	93	127
ENSG00000083097	DOP1A	612	505	7	108	455	349	276	436	297	454
ENSG00000083099	LYRM2	491	505	1	71	257	247	192	245	178	261
ENSG00000083123	BCKDHB	172	126	13	42	123	87	47	100	49	101
ENSG00000083168	KAT6A	5040	4719	64	269	1222	1050	996	1360	1502	1153
ENSG00000083223	TUT7	5855	6678	60	171	1045	953	1113	1253	1686	1523
ENSG00000083290	ULK2	722	551	0	110	331	327	218	358	212	287
ENSG00000083307	GRHL2	0	0	0	0	0	3	2	1	1	0
ENSG00000083312	TNPO1	1140	863	24	91	1008	759	662	1116	933	1105
ENSG00000083444	PLOD1	1208	1228	17	60	637	1082	1356	908	1343	623
ENSG00000083454	P2RX5	317	424	0	50	416	311	506	322	410	470
ENSG00000083457	ITGAE	446	420	34	61	198	225	202	209	174	213
ENSG00000083520	DIS3	691	622	27	106	534	503	312	623	426	645
ENSG00000083535	PIBF1	403	347	10	39	110	93	59	117	71	119
ENSG00000083544	TDRD3	325	294	11	50	164	199	134	200	126	204
ENSG00000083622	AC000061.1	0	0	0	0	0	0	0	0	0	0
ENSG00000083635	NUFIP1	70	81	11	8	71	62	31	58	41	72
ENSG00000083642	PDS5B	892	917	6	82	474	374	357	555	461	552
ENSG00000083720	OXCT1	463	456	9	51	291	250	183	398	170	345
ENSG00000083750	RRAGB	241	215	0	27	114	69	73	106	74	124
ENSG00000083782	EPYC	0	0	0	0	0	0	0	0	0	0
ENSG00000083799	CYLD	4766	5632	154	595	2554	2094	1865	2936	2420	3208
ENSG00000083807	SLC27A5	209	149	14	48	161	205	230	146	158	189
ENSG00000083812	ZNF324	377	313	0	24	161	120	167	211	169	154
ENSG00000083814	ZNF671	267	272	0	42	345	424	409	353	361	365
ENSG00000083817	ZNF416	30	81	0	12	75	70	77	88	74	47
ENSG00000083828	ZNF586	680	850	0	100	316	321	281	333	394	416
ENSG00000083838	ZNF446	281	199	13	67	208	250	292	228	204	226
ENSG00000083844	ZNF264	489	432	17	75	412	438	361	459	381	475
ENSG00000083845	RPS5	8645	7861	254	2293	9035	9824	7106	8179	5238	8797
ENSG00000083857	FAT1	0	0	12	3	1	0	0	0	0	0
ENSG00000083896	YTHDC1	2443	2533	49	301	1225	1226	1105	1324	1346	1347
ENSG00000083937	CHMP2B	765	793	0	69	510	405	359	481	509	555
ENSG00000084070	SMAP2	25128	24455	315	1466	11108	11651	17360	9136	23847	10347
ENSG00000084072	PPIE	605	662	10	180	488	858	625	698	582	578
ENSG00000084073	ZMPSTE24	571	670	0	25	488	492	464	497	588	562
ENSG00000084090	STARD7	1988	1838	18	186	1509	1803	1315	1861	1215	1695
ENSG00000084092	NOA1	628	509	26	88	332	413	340	412	285	351
ENSG00000084093	REST	1095	1175	4	178	586	521	401	606	506	618
ENSG00000084110	HAL	2641	2665	16	63	561	992	1631	683	3353	1043
ENSG00000084112	SSH1	1453	1233	50	181	672	707	702	802	900	595
ENSG00000084207	GSTP1	3115	2742	184	447	2203	4496	2865	3103	2213	1974
ENSG00000084234	APLP2	19292	17298	282	230	4239	6080	6263	4508	9819	4628
ENSG00000084444	FAM234B	53	76	0	7	63	44	48	72	62	66
ENSG00000084453	SLCO1A2	0	3	0	7	0	0	0	0	0	1
ENSG00000084463	WBP11	1765	1801	37	233	1204	1260	1081	1350	1032	974
ENSG00000084623	EIF3I	2396	2331	169	462	1238	1606	1437	1709	1019	1416
ENSG00000084628	NKAIN1	0	2	0	0	0	0	0	0	0	0
ENSG00000084636	COL16A1	0	0	0	0	2	1	0	2	3	0
ENSG00000084652	TXLNA	1162	1085	40	170	1066	1057	1048	1411	987	1192
ENSG00000084674	APOB	0	0	0	0	0	0	0	0	0	0
ENSG00000084676	NCOA1	5700	5756	75	179	1181	1346	1487	1364	2069	1117
ENSG00000084693	AGBL5	1209	1290	145	957	791	831	730	903	619	691
ENSG00000084710	EFR3B	8	7	0	0	8	10	5	7	9	8
ENSG00000084731	KIF3C	290	287	19	99	96	107	172	98	237	108
ENSG00000084733	RAB10	2033	2288	47	231	1358	1633	1203	1692	1725	1546
ENSG00000084734	GCKR	0	2	0	0	0	0	0	0	0	1
ENSG00000084754	HADHA	5154	4147	138	501	2696	3334	2858	3024	2875	2520
ENSG00000084764	MAPRE3	264	234	0	15	72	135	177	82	223	90
ENSG00000084774	CAD	625	567	40	116	575	554	636	859	543	762
ENSG00000085063	CD59	719	931	35	166	397	445	522	464	652	654
ENSG00000085117	CD82	2690	2320	102	271	1348	1818	2674	1646	3215	1740
ENSG00000085185	BCORL1	400	392	0	18	213	242	296	226	421	215
ENSG00000085224	ATRX	2121	2006	14	129	632	472	400	758	575	740
ENSG00000085231	AK6	43	56	0	24	54	63	21	44	21	34
ENSG00000085265	FCN1	48166	50202	821	562	14526	26753	20153	20597	25052	14862
ENSG00000085274	MYNN	564	588	0	41	211	170	138	230	204	227
ENSG00000085276	MECOM	3	1	0	0	1	0	1	0	0	2
ENSG00000085365	SCAMP1	266	259	21	15	283	237	143	312	212	266
ENSG00000085377	PREP	656	616	22	95	531	735	472	688	400	515
ENSG00000085382	HACE1	169	153	0	0	81	38	28	77	34	64
ENSG00000085415	SEH1L	204	201	27	58	349	412	206	358	194	352
ENSG00000085433	WDR47	423	438	6	31	170	172	145	180	202	186
ENSG00000085449	WDFY1	450	418	0	40	480	518	314	684	409	559
ENSG00000085465	OVGP1	60	58	1	7	111	129	86	83	84	90
ENSG00000085491	SLC25A24	567	574	0	40	347	194	163	359	215	273
ENSG00000085511	MAP3K4	583	683	34	169	493	466	432	525	372	519
ENSG00000085514	PILRA	5775	7269	176	185	1914	3191	4000	2397	6701	2033
ENSG00000085552	IGSF9	11	11	4	0	1	3	6	0	1	5
ENSG00000085563	ABCB1	282	205	0	10	145	231	120	264	99	153
ENSG00000085644	ZNF213	281	279	0	35	373	456	553	402	542	330
ENSG00000085662	AKR1B1	1082	738	44	234	1067	1329	1085	1172	643	973
ENSG00000085719	CPNE3	1191	1036	7	56	921	884	650	851	904	768
ENSG00000085721	RRN3	396	376	0	88	447	323	228	510	200	438
ENSG00000085733	CTTN	145	220	102	347	110	201	218	122	171	58
ENSG00000085741	WNT11	3	3	0	8	7	7	11	4	10	4
ENSG00000085760	MTIF2	578	593	58	89	268	228	215	300	193	306
ENSG00000085788	DDHD2	824	709	16	111	546	469	336	507	365	602
ENSG00000085831	TTC39A	29	16	0	0	19	21	16	22	21	16
ENSG00000085832	EPS15	2102	2091	21	196	969	1005	794	1192	965	1068
ENSG00000085840	ORC1	36	29	0	6	15	19	28	41	14	35
ENSG00000085871	MGST2	427	482	28	56	142	310	215	192	286	152
ENSG00000085872	CHERP	856	710	4	204	611	584	640	673	687	641
ENSG00000085978	ATG16L1	954	926	11	242	631	659	610	829	595	799
ENSG00000085982	USP40	311	300	3	46	200	261	187	289	206	235
ENSG00000085998	POMGNT1	394	391	10	139	408	477	464	534	354	500
ENSG00000085999	RAD54L	42	56	0	33	40	55	35	53	37	58
ENSG00000086015	MAST2	251	282	12	31	195	208	250	285	230	175
ENSG00000086061	DNAJA1	4343	5184	92	420	1267	1443	1215	1497	1501	2012
ENSG00000086062	B4GALT1	3030	2751	19	88	1686	2072	2205	2164	2783	2065
ENSG00000086065	CHMP5	1019	1783	69	112	380	275	256	409	487	429
ENSG00000086102	NFX1	1162	1172	29	227	642	618	489	739	507	613
ENSG00000086159	AQP6	0	0	0	0	1	0	1	0	0	0
ENSG00000086189	DIMT1	701	678	37	189	447	349	270	552	266	507
ENSG00000086200	IPO11	115	108	16	21	118	104	66	121	91	127
ENSG00000086205	FOLH1	0	0	0	0	0	0	0	0	0	0
ENSG00000086232	EIF2AK1	2505	2941	159	731	2371	2449	2146	1927	1672	1596
ENSG00000086288	NME8	178	182	0	24	54	141	41	77	104	107
ENSG00000086289	EPDR1	21	10	0	0	14	14	6	10	3	2
ENSG00000086300	SNX10	2152	2511	76	75	924	812	610	990	1148	950
ENSG00000086475	SEPHS1	358	412	79	117	352	352	248	381	228	359
ENSG00000086504	MRPL28	805	757	34	185	593	946	995	743	772	695
ENSG00000086506	HBQ1	0	1	0	0	188	185	258	55	61	120
ENSG00000086544	ITPKC	380	326	0	29	263	327	407	382	361	310
ENSG00000086548	CEACAM6	10	23	4	0	3	26	65	10	9	10
ENSG00000086570	FAT2	12	11	0	0	22	30	25	28	23	19
ENSG00000086589	RBM22	2532	2866	52	343	878	1184	1106	1049	1237	976
ENSG00000086598	TMED2	1960	1980	70	156	1443	1504	1227	1495	1435	1570
ENSG00000086619	ERO1B	240	234	17	26	221	169	134	236	190	261
ENSG00000086666	ZFAND6	943	828	20	169	785	717	675	741	777	903
ENSG00000086696	HSD17B2	0	0	0	0	1	3	0	0	2	1
ENSG00000086712	TXLNG	376	473	13	69	223	213	174	338	202	340
ENSG00000086717	PPEF1	18	19	0	0	7	8	6	10	9	6
ENSG00000086730	LAT2	7354	9139	70	188	2312	3759	5178	2996	6962	2748
ENSG00000086758	HUWE1	3216	2888	70	390	1801	1624	1773	2306	1806	1772
ENSG00000086827	ZW10	237	287	7	15	150	182	140	163	128	164
ENSG00000086848	ALG9	39	44	0	6	57	40	19	41	28	55
ENSG00000086967	MYBPC2	1	15	0	0	4	2	1	0	1	7
ENSG00000086991	NOX4	0	0	0	0	0	0	0	0	0	0
ENSG00000087008	ACOX3	190	175	11	12	159	169	151	189	184	144
ENSG00000087053	MTMR2	184	201	27	35	160	166	104	250	90	170
ENSG00000087074	PPP1R15A	33246	32002	391	284	922	1451	1653	931	2488	1267
ENSG00000087076	HSD17B14	7	2	0	10	7	7	3	13	3	5
ENSG00000087077	TRIP6	199	147	12	9	112	162	171	211	187	209
ENSG00000087085	ACHE	0	0	0	0	15	4	6	3	1	1
ENSG00000087086	FTL	110675	108249	3627	11373	48355	76665	71517	57861	81280	43288
ENSG00000087087	SRRT	3082	3156	70	646	1552	1720	2047	1897	1817	1825
ENSG00000087088	BAX	1382	1677	62	273	854	1534	1404	1112	1315	1149
ENSG00000087095	NLK	256	296	0	71	213	193	137	283	194	248
ENSG00000087111	PIGS	1172	1023	21	164	957	1251	1179	1182	1166	915
ENSG00000087116	ADAMTS2	25	1	0	11	0	0	6	1	7	1
ENSG00000087128	TMPRSS11E	1	0	0	0	0	0	1	0	2	2
ENSG00000087152	ATXN7L3	4066	3792	46	338	1770	1668	1966	2233	2201	1875
ENSG00000087157	PGS1	2564	1849	50	158	1286	1486	1872	1853	2605	2067
ENSG00000087191	PSMC5	1923	2150	107	653	1219	1683	1587	1873	1211	1383
ENSG00000087206	UIMC1	2530	2949	61	217	680	658	771	654	988	666
ENSG00000087237	CETP	36	48	0	16	38	26	58	108	77	118
ENSG00000087245	MMP2	1	0	0	1	0	1	1	0	1	1
ENSG00000087250	MT3	1	0	0	0	3	5	1	4	0	4
ENSG00000087253	LPCAT2	1972	2716	2	31	860	730	748	922	1524	1369
ENSG00000087258	GNAO1	94	114	0	39	38	32	70	45	32	31
ENSG00000087263	OGFOD1	351	413	13	150	373	425	336	457	336	352
ENSG00000087266	SH3BP2	7507	7198	79	462	3788	4782	5974	5712	7682	4548
ENSG00000087269	NOP14	679	685	37	162	662	626	555	643	456	665
ENSG00000087274	ADD1	6389	6075	150	726	4002	4357	4447	3905	4666	3309
ENSG00000087299	L2HGDH	41	41	0	11	34	25	15	49	9	38
ENSG00000087301	TXNDC16	205	153	0	37	103	116	89	120	94	110
ENSG00000087302	RTRAF	1405	1564	90	374	742	769	644	852	524	769
ENSG00000087303	NID2	53	48	0	4	18	12	7	24	17	17
ENSG00000087338	GMCL1	539	449	0	75	464	385	309	430	437	432
ENSG00000087365	SF3B2	5415	5448	120	778	3139	3899	4522	3526	4378	3164
ENSG00000087448	KLHL42	318	282	17	26	219	233	154	309	143	275
ENSG00000087460	GNAS	14826	16077	828	4222	14995	15384	14293	13380	13835	11038
ENSG00000087470	DNM1L	784	613	48	94	480	515	319	571	328	525
ENSG00000087494	PTHLH	0	0	0	0	0	0	0	0	0	0
ENSG00000087495	PHACTR3	6	17	0	12	0	9	2	1	4	4
ENSG00000087502	ERGIC2	400	529	19	49	249	194	150	224	279	278
ENSG00000087510	TFAP2C	0	0	0	10	0	0	0	0	0	0
ENSG00000087586	AURKA	37	36	0	6	33	40	26	57	22	35
ENSG00000087589	CASS4	1497	1953	44	94	554	516	853	554	1392	555
ENSG00000087842	PIR	3	0	0	0	1	2	3	1	1	2
ENSG00000087884	AAMDC	75	102	12	43	56	83	48	65	50	44
ENSG00000087903	RFX2	1152	660	23	25	159	344	218	193	530	237
ENSG00000087995	METTL2A	126	86	6	16	124	110	94	165	73	143
ENSG00000088002	SULT2B1	3	2	0	0	4	2	3	5	2	12
ENSG00000088035	ALG6	161	133	19	27	235	265	197	277	220	292
ENSG00000088038	CNOT3	1633	1574	42	175	847	1054	1343	1022	1513	1027
ENSG00000088053	GP6	19	36	14	73	13	61	39	13	35	14
ENSG00000088179	PTPN4	950	886	29	192	896	974	520	1108	452	953
ENSG00000088205	DDX18	1417	1399	72	249	1060	937	743	1221	736	1027
ENSG00000088247	KHSRP	1980	1687	33	214	1360	1121	1333	1488	1217	1267
ENSG00000088256	GNA11	110	74	13	0	90	82	57	85	60	54
ENSG00000088280	ASAP3	13	8	10	0	16	19	16	19	12	19
ENSG00000088298	EDEM2	1362	1473	33	146	639	977	858	849	986	713
ENSG00000088305	DNMT3B	27	25	28	37	9	15	12	10	9	11
ENSG00000088320	REM1	0	0	0	0	0	0	0	0	0	0
ENSG00000088325	TPX2	45	59	5	7	17	39	29	92	16	64
ENSG00000088340	FER1L4	2	5	0	0	9	3	5	7	7	9
ENSG00000088356	PDRG1	272	343	15	49	237	264	224	320	202	244
ENSG00000088367	EPB41L1	1	5	0	0	1	2	2	4	3	4
ENSG00000088386	SLC15A1	0	0	0	0	0	0	0	0	0	0
ENSG00000088387	DOCK9	662	891	13	116	521	252	202	499	249	413
ENSG00000088448	ANKRD10	1352	1282	57	200	1282	1467	989	1490	1053	1504
ENSG00000088451	TGDS	122	119	9	31	159	106	65	173	103	152
ENSG00000088538	DOCK3	60	69	0	28	43	51	20	34	30	50
ENSG00000088543	C3orf18	181	167	5	65	218	206	181	231	143	222
ENSG00000088682	COQ9	328	303	13	93	306	370	299	396	307	332
ENSG00000088726	TMEM40	73	91	86	248	77	98	108	79	50	53
ENSG00000088727	KIF9	122	95	5	0	32	40	50	40	45	50
ENSG00000088756	ARHGAP28	0	0	0	0	0	0	0	0	0	0
ENSG00000088766	CRLS1	15	10	0	0	13	9	3	9	7	25
ENSG00000088782	DEFB127	0	0	0	2	0	0	0	0	0	0
ENSG00000088808	PPP1R13B	326	284	33	65	264	344	289	321	204	204
ENSG00000088812	ATRN	748	598	35	74	315	299	243	305	260	270
ENSG00000088826	SMOX	174	207	73	370	242	350	425	229	226	119
ENSG00000088827	SIGLEC1	303	2149	0	0	140	132	293	678	603	162
ENSG00000088832	FKBP1A	4436	6050	149	687	2674	3860	4071	3178	4541	2673
ENSG00000088833	NSFL1C	2509	2629	65	252	1133	1904	2382	1340	2786	1147
ENSG00000088836	SLC4A11	10	8	0	0	4	3	3	14	6	11
ENSG00000088854	C20orf194	348	319	0	72	172	146	127	188	151	175
ENSG00000088876	ZNF343	127	114	19	23	106	81	92	116	108	98
ENSG00000088881	EBF4	34	19	0	0	49	88	54	47	35	46
ENSG00000088882	CPXM1	8	1	0	2	7	6	9	1	6	6
ENSG00000088888	MAVS	2137	1921	61	233	1772	1630	1667	2298	1969	1695
ENSG00000088899	LZTS3	39	56	0	1	66	49	37	54	35	48
ENSG00000088926	F11	0	1	0	0	0	2	0	0	0	0
ENSG00000088930	XRN2	3914	3420	73	216	1639	1848	1919	1780	2423	1858
ENSG00000088970	KIZ	661	585	11	57	317	359	451	316	371	361
ENSG00000088986	DYNLL1	1191	1526	103	469	893	1227	941	1264	776	941
ENSG00000088992	TESC	437	438	15	41	1672	938	1133	719	572	446
ENSG00000089006	SNX5	1182	1129	77	246	1062	1225	935	1447	811	1191
ENSG00000089009	AC004086.1	20366	19800	1281	6899	9474	4810	4046	5510	3380	5973
ENSG00000089012	SIRPG	266	401	40	180	558	602	460	744	441	811
ENSG00000089022	MAPKAPK5	943	902	32	128	326	317	228	369	243	385
ENSG00000089041	P2RX7	770	696	0	80	369	326	249	519	265	402
ENSG00000089048	ESF1	165	204	5	34	91	51	42	75	30	104
ENSG00000089050	RBBP9	186	169	2	10	123	129	90	167	88	114
ENSG00000089053	ANAPC5	2935	2861	77	692	2149	2522	2455	2601	2126	2288
ENSG00000089057	SLC23A2	770	651	5	74	735	636	571	841	817	724
ENSG00000089060	SLC8B1	1404	1377	22	264	1112	1346	1349	1143	1483	1251
ENSG00000089063	TMEM230	1286	1185	36	190	1018	1076	686	1042	675	863
ENSG00000089091	DZANK1	52	47	0	13	39	21	24	35	24	35
ENSG00000089094	KDM2B	1091	1081	37	130	813	729	651	1058	576	745
ENSG00000089101	CFAP61	0	0	0	0	0	3	0	0	0	0
ENSG00000089116	LHX5	0	0	0	0	0	0	0	0	0	0
ENSG00000089123	TASP1	105	96	0	22	95	74	43	86	46	91
ENSG00000089127	AC004551.1	1315	7468	25	127	1118	1678	1520	3270	2013	1290
ENSG00000089154	GCN1	1530	1367	83	354	1718	1474	1462	2070	1366	1637
ENSG00000089157	RPLP0	20588	19666	944	6411	15857	13247	10853	12682	8125	12402
ENSG00000089159	PXN	11387	11100	253	1143	6290	9904	11619	8215	15164	8024
ENSG00000089163	SIRT4	8	6	0	8	17	31	18	35	20	18
ENSG00000089169	RPH3A	529	565	1	0	34	53	36	48	156	113
ENSG00000089177	KIF16B	203	245	0	16	137	102	77	118	111	83
ENSG00000089195	TRMT6	353	371	1	46	230	224	149	223	163	225
ENSG00000089199	CHGB	2	1	0	3	0	0	0	0	1	1
ENSG00000089220	PEBP1	1279	1262	77	424	1233	1349	1091	1223	731	1138
ENSG00000089225	TBX5	0	0	0	0	0	0	0	0	1	0
ENSG00000089234	BRAP	608	735	17	102	314	421	371	446	496	363
ENSG00000089248	ERP29	3831	4175	123	700	2360	2659	2560	3029	2250	2729
ENSG00000089250	NOS1	1	0	0	0	0	0	0	0	0	0
ENSG00000089280	FUS	7438	7297	246	1089	3539	3848	3609	4581	4219	4760
ENSG00000089289	IGBP1	2221	2298	89	379	798	820	824	1003	853	922
ENSG00000089327	FXYD5	4191	5251	307	2028	4912	7215	6008	6182	5015	4423
ENSG00000089335	ZNF302	317	301	7	44	247	147	89	209	109	271
ENSG00000089351	GRAMD1A	4270	3643	72	265	1819	2018	3341	2159	4029	2356
ENSG00000089356	FXYD3	0	0	0	0	0	0	0	0	1	0
ENSG00000089472	HEPH	0	24	0	0	2	2	1	2	11	6
ENSG00000089486	CDIP1	639	698	48	128	679	1088	830	847	716	608
ENSG00000089505	CMTM1	45	79	0	0	31	19	39	69	88	45
ENSG00000089558	KCNH4	5	4	0	0	0	4	3	6	1	4
ENSG00000089597	GANAB	5331	4684	183	748	2853	3383	2918	3403	3190	2980
ENSG00000089639	GMIP	9382	8968	43	552	3231	3223	6365	4124	7392	3786
ENSG00000089682	RBM41	170	204	14	32	51	33	30	54	34	51
ENSG00000089685	BIRC5	13	21	7	7	12	22	23	66	11	42
ENSG00000089692	LAG3	177	157	14	59	111	124	264	293	72	221
ENSG00000089693	MLF2	3892	3947	98	383	1828	2708	3393	1872	3663	1742
ENSG00000089723	OTUB2	21	20	0	0	6	17	16	15	14	15
ENSG00000089737	DDX24	2853	2874	63	442	2170	2301	2057	2464	1817	2050
ENSG00000089775	ZBTB25	657	539	0	138	551	438	276	688	348	697
ENSG00000089818	NECAP1	1250	1486	0	92	439	495	396	572	511	594
ENSG00000089820	ARHGAP4	5475	5384	165	1304	5598	5325	9034	5988	7853	7654
ENSG00000089847	ANKRD24	23	18	0	2	11	11	16	22	22	17
ENSG00000089876	DHX32	237	252	0	41	162	266	178	283	143	218
ENSG00000089902	RCOR1	1971	1926	28	20	666	821	866	826	1401	737
ENSG00000089916	GPATCH2L	1146	1000	25	96	570	495	430	651	654	589
ENSG00000090006	LTBP4	531	540	41	249	658	634	836	666	523	775
ENSG00000090013	BLVRB	1117	903	43	124	1908	2078	1982	1755	1485	951
ENSG00000090020	SLC9A1	951	996	15	90	453	668	818	648	1138	534
ENSG00000090054	SPTLC1	858	812	35	68	561	572	406	671	686	649
ENSG00000090060	PAPOLA	5244	5349	90	298	2219	1979	1864	2672	2846	2484
ENSG00000090061	CCNK	1550	1791	78	245	934	1043	1015	1136	1173	852
ENSG00000090097	PCBP4	162	193	20	122	181	219	221	243	162	215
ENSG00000090104	RGS1	340	494	0	26	19	22	20	36	25	35
ENSG00000090238	YPEL3	6043	6580	114	941	3461	5186	7175	3458	7380	4168
ENSG00000090263	MRPS33	297	316	9	137	137	99	63	163	59	152
ENSG00000090266	NDUFB2	768	1000	31	256	576	668	417	708	351	598
ENSG00000090273	NUDC	1002	1143	67	367	794	1125	958	969	867	835
ENSG00000090316	MAEA	2072	1902	61	301	1367	1337	1710	1670	2556	2115
ENSG00000090339	ICAM1	3878	3275	0	22	486	797	663	744	904	873
ENSG00000090372	STRN4	2858	2573	51	266	1496	1873	2727	1670	2523	1648
ENSG00000090376	IRAK3	2133	1656	0	26	928	1189	896	1194	1872	1447
ENSG00000090382	LYZ	117917	119438	2369	1612	25901	53999	53397	62082	66653	64235
ENSG00000090402	SI	0	0	0	0	0	0	0	0	0	0
ENSG00000090432	MUL1	565	548	4	66	421	731	614	561	672	432
ENSG00000090447	TFAP4	121	129	11	38	224	239	203	250	206	237
ENSG00000090470	PDCD7	461	495	8	40	298	301	224	372	207	313
ENSG00000090487	SPG21	3034	2840	78	245	1291	1745	1880	1399	2436	1406
ENSG00000090512	FETUB	0	0	0	0	0	0	0	0	0	0
ENSG00000090520	DNAJB11	662	720	33	116	206	265	230	294	267	276
ENSG00000090530	P3H2	16	14	0	0	13	24	11	6	6	10
ENSG00000090534	THPO	0	0	0	0	0	0	0	0	0	0
ENSG00000090539	CHRD	0	0	0	0	0	0	0	1	1	0
ENSG00000090554	FLT3LG	42	37	11	17	46	48	41	66	34	87
ENSG00000090565	RAB11FIP3	362	305	21	63	410	505	473	557	374	553
ENSG00000090581	GNPTG	1268	1138	34	188	835	1252	1173	1070	1183	1114
ENSG00000090612	ZNF268	128	182	0	30	128	95	84	138	86	107
ENSG00000090615	GOLGA3	1121	1075	47	161	843	876	771	1081	795	1137
ENSG00000090621	PABPC4	3072	2618	120	302	1915	2032	1490	2017	1397	1876
ENSG00000090659	CD209	51	40	0	0	15	11	17	16	19	9
ENSG00000090661	CERS4	372	378	0	34	382	491	316	375	526	356
ENSG00000090674	MCOLN1	673	594	0	39	431	538	660	460	673	366
ENSG00000090686	USP48	1827	1665	71	180	765	752	812	908	1136	881
ENSG00000090776	EFNB1	96	146	10	76	115	151	119	114	75	91
ENSG00000090857	PDPR	1522	616	13	89	1141	931	770	1007	887	704
ENSG00000090861	AARS	651	702	23	156	754	732	700	923	579	786
ENSG00000090863	GLG1	3497	3447	45	452	1882	1980	1922	2214	2032	1884
ENSG00000090889	KIF4A	7	13	0	7	4	1	4	30	3	21
ENSG00000090905	TNRC6A	1023	807	6	117	716	670	460	795	517	778
ENSG00000090924	PLEKHG2	1638	1305	50	61	406	407	334	511	319	521
ENSG00000090932	DLL3	2	1	0	0	3	0	2	0	2	3
ENSG00000090971	NAT14	22	22	3	23	55	46	60	50	42	37
ENSG00000090975	PITPNM2	294	274	22	123	587	471	331	584	299	405
ENSG00000090989	EXOC1	911	898	33	64	539	592	477	588	606	701
ENSG00000091009	RBM27	176	200	0	24	295	218	155	237	201	266
ENSG00000091010	POU4F3	0	6	0	0	2	2	1	0	1	0
ENSG00000091039	OSBPL8	2939	2952	63	106	1616	1003	769	1681	1627	1813
ENSG00000091073	DTX2	465	488	5	49	444	515	719	433	612	525
ENSG00000091106	NLRC4	758	659	16	30	364	501	636	651	989	547
ENSG00000091127	PUS7	84	82	0	8	57	50	26	56	41	53
ENSG00000091128	LAMB4	0	0	0	0	0	0	0	0	0	0
ENSG00000091129	NRCAM	18	3	0	0	80	32	16	28	16	54
ENSG00000091136	LAMB1	34	32	0	8	1	2	11	12	16	9
ENSG00000091137	SLC26A4	2	0	0	0	3	0	0	4	0	1
ENSG00000091138	SLC26A3	0	0	0	10	3	4	3	3	0	4
ENSG00000091140	DLD	752	674	5	69	509	456	399	550	454	518
ENSG00000091157	WDR7	405	397	15	24	272	207	161	297	179	237
ENSG00000091164	TXNL1	862	773	30	80	450	544	514	525	516	502
ENSG00000091181	IL5RA	193	240	0	16	411	139	326	159	209	83
ENSG00000091262	ABCC6	263	214	0	23	106	70	97	65	216	61
ENSG00000091317	CMTM6	4784	4985	77	183	2879	3127	3430	3442	6029	3818
ENSG00000091409	ITGA6	700	931	39	176	1046	687	354	869	494	878
ENSG00000091428	RAPGEF4	3	2	0	0	1	0	0	1	0	2
ENSG00000091436	MAP3K20	766	377	0	0	130	134	105	153	159	125
ENSG00000091482	SMPX	0	0	0	0	0	0	0	0	0	0
ENSG00000091483	FH	553	574	21	29	379	497	376	529	301	391
ENSG00000091490	SEL1L3	1247	1354	26	197	1199	760	686	932	645	1049
ENSG00000091513	TF	6	4	0	15	6	10	8	2	1	4
ENSG00000091527	CDV3	6546	7080	120	444	2233	2301	1732	2375	2128	2442
ENSG00000091536	MYO15A	30	15	0	0	22	25	11	9	17	20
ENSG00000091542	ALKBH5	2188	2299	53	167	1388	1814	1718	1457	1358	1269
ENSG00000091583	APOH	0	0	0	0	0	0	0	0	0	0
ENSG00000091592	NLRP1	14218	12801	294	1319	5071	4789	8593	6407	10640	6240
ENSG00000091622	PITPNM3	7	10	10	0	11	6	7	13	11	26
ENSG00000091640	SPAG7	977	955	31	201	397	507	497	494	363	515
ENSG00000091651	ORC6	31	31	0	12	7	13	7	26	7	27
ENSG00000091656	ZFHX4	0	0	0	0	1	0	0	3	0	0
ENSG00000091664	SLC17A6	0	0	0	0	0	0	0	0	0	0
ENSG00000091704	CPA1	0	0	0	7	0	0	0	1	0	0
ENSG00000091732	ZC3HC1	166	178	8	28	190	212	170	238	136	214
ENSG00000091831	ESR1	24	19	0	9	28	16	13	60	15	37
ENSG00000091844	RGS17	8	2	0	0	23	15	5	27	4	18
ENSG00000091879	ANGPT2	12	14	0	0	7	3	8	6	3	1
ENSG00000091947	TMEM101	319	331	9	43	398	543	463	538	388	424
ENSG00000091972	CD200	53	77	3	14	92	28	42	61	52	75
ENSG00000091986	CCDC80	62	51	1	16	3	2	3	12	4	3
ENSG00000092009	CMA1	0	0	0	7	1	0	0	0	0	0
ENSG00000092010	PSME1	7069	9154	279	1233	4901	6993	7146	6880	6796	6058
ENSG00000092020	PPP2R3C	1475	1417	43	119	436	586	710	629	1048	662
ENSG00000092036	HAUS4	733	560	18	20	139	216	283	344	470	305
ENSG00000092051	JPH4	41	35	0	0	14	18	20	21	23	13
ENSG00000092054	MYH7	0	0	0	0	0	0	0	0	0	0
ENSG00000092067	CEBPE	53	112	3	48	313	197	305	132	164	86
ENSG00000092068	SLC7A8	32	29	2	21	82	36	58	48	27	25
ENSG00000092094	OSGEP	928	1052	39	272	680	886	770	772	841	815
ENSG00000092096	SLC22A17	42	36	18	104	94	73	59	51	69	86
ENSG00000092098	RNF31	81	123	4	9	67	70	103	75	91	91
ENSG00000092108	SCFD1	727	685	17	128	385	534	313	573	347	500
ENSG00000092140	G2E3	198	186	19	13	222	167	103	242	137	234
ENSG00000092148	HECTD1	1835	1536	11	157	885	669	579	947	741	888
ENSG00000092199	HNRNPC	11946	12626	308	1277	5693	4811	5175	5907	6034	5288
ENSG00000092200	RPGRIP1	342	464	0	14	114	117	228	83	316	106
ENSG00000092201	SUPT16H	1842	1778	105	393	1253	1154	1079	1412	1211	1256
ENSG00000092203	TOX4	2833	2886	89	387	1330	1577	1497	1571	1822	1471
ENSG00000092208	GEMIN2	93	99	27	25	60	41	23	39	37	54
ENSG00000092295	TGM1	47	28	0	16	38	26	86	66	71	74
ENSG00000092330	AL096870.1	2331	2383	44	242	1392	1778	1619	1633	1646	1459
ENSG00000092345	DAZL	6	2	0	0	3	2	0	0	1	1
ENSG00000092377	TBL1Y	0	0	0	0	0	0	1	0	0	0
ENSG00000092421	SEMA6A	58	48	0	19	38	51	27	51	33	41
ENSG00000092439	TRPM7	1330	1163	15	120	530	385	337	675	380	639
ENSG00000092445	TYRO3	0	6	0	3	1	1	2	1	3	2
ENSG00000092470	WDR76	106	108	0	40	71	84	61	115	47	123
ENSG00000092529	CAPN3	44	27	0	0	52	28	52	42	45	47
ENSG00000092531	SNAP23	3785	3902	193	369	2074	2020	1874	2090	2776	2152
ENSG00000092607	TBX15	0	0	0	0	0	0	1	0	0	0
ENSG00000092621	PHGDH	39	27	20	27	77	73	30	72	46	101
ENSG00000092758	COL9A3	137	92	0	1	64	117	181	96	145	80
ENSG00000092820	EZR	3873	4742	117	1015	2702	2771	2837	3264	2259	2431
ENSG00000092841	MYL6	11135	13637	309	2960	3775	4733	4854	3941	4626	4167
ENSG00000092847	AGO1	1443	1314	55	60	795	1045	976	962	1194	817
ENSG00000092850	TEKT2	6	8	0	4	2	4	3	1	7	0
ENSG00000092853	CLSPN	37	36	9	0	12	16	17	46	18	29
ENSG00000092871	RFFL	1354	1369	23	76	918	1037	1246	1124	1545	978
ENSG00000092929	UNC13D	6827	6613	122	778	4312	4595	7720	4683	9487	4647
ENSG00000092931	MFSD11	2256	2388	18	241	869	773	693	1027	637	1201
ENSG00000092964	DPYSL2	1149	1178	40	67	692	1094	603	887	563	647
ENSG00000092969	TGFB2	2	4	0	0	2	0	0	1	0	0
ENSG00000092978	GPATCH2	170	120	0	23	101	107	54	123	52	112
ENSG00000093000	NUP50	2187	2912	97	301	1641	1239	1445	1676	2047	1673
ENSG00000093009	CDC45	12	13	0	9	12	9	15	31	8	15
ENSG00000093010	COMT	680	625	29	76	591	976	715	786	617	594
ENSG00000093072	ADA2	7164	6497	125	506	3653	5125	4092	6060	3841	3364
ENSG00000093100	AC016026.1	0	0	0	0	0	0	1	0	0	0
ENSG00000093134	VNN3	3289	3949	45	61	284	519	778	331	2124	399
ENSG00000093144	ECHDC1	892	1070	23	88	559	473	359	512	466	673
ENSG00000093167	LRRFIP2	1127	880	17	102	455	488	432	499	597	597
[truncated: 58,558 more rows]
